# Supplementary material for: Assessing the impact of screening, early identification and intervention programmes for chronic kidney disease: protocol for a scoping review
Source: PubMed Central journal article supplement — BMJ Open. 2021 Dec 16;11(12):e053857. doi: 10.1136/bmjopen-2021-053857 (PMC8679109; doi:10.1136/bmjopen-2021-053857), 2021-12-16

# BMJ Open

BMJ Open is committed to open peer review. As part of this commitment we make the peer review history of every article we publish publicly available.

When an article is published we post the peer reviewers' comments and the authors' responses online. We also post the versions of the paper that were used during peer review. These are the versions that the peer review comments apply to.

The versions of the paper that follow are the versions that were submitted during the peer review process. They are not the versions of record or the final published versions. They should not be cited or distributed as the published version of this manuscript.

BMJ Open is an open access journal and the full, final, typeset and author-corrected version of record of the manuscript is available on our site with no access controls, subscription charges or pay-per-view fees (<http://bmjopen.bmj.com>).

If you have any questions on BMJ Open's open peer review process please email [info.bmjopen@bmj.com](mailto:info.bmjopen@bmj.com)

# BMJ Open

## Assessing the impact of screening, early identification, and intervention programs for CKD: Protocol for a scoping review.

|                               |                                                                                                                                                                                                                                                                                                                                                                                                                                                                                                                                                                                                                                                                                                                                                                                                                                                                                                                                                                                                                                                                                                                                                                                                                                                                               |
|-------------------------------|-------------------------------------------------------------------------------------------------------------------------------------------------------------------------------------------------------------------------------------------------------------------------------------------------------------------------------------------------------------------------------------------------------------------------------------------------------------------------------------------------------------------------------------------------------------------------------------------------------------------------------------------------------------------------------------------------------------------------------------------------------------------------------------------------------------------------------------------------------------------------------------------------------------------------------------------------------------------------------------------------------------------------------------------------------------------------------------------------------------------------------------------------------------------------------------------------------------------------------------------------------------------------------|
| Journal:                      | <i>BMJ Open</i>                                                                                                                                                                                                                                                                                                                                                                                                                                                                                                                                                                                                                                                                                                                                                                                                                                                                                                                                                                                                                                                                                                                                                                                                                                                               |
| Manuscript ID                 | bmjopen-2021-053857                                                                                                                                                                                                                                                                                                                                                                                                                                                                                                                                                                                                                                                                                                                                                                                                                                                                                                                                                                                                                                                                                                                                                                                                                                                           |
| Article Type:                 | Protocol                                                                                                                                                                                                                                                                                                                                                                                                                                                                                                                                                                                                                                                                                                                                                                                                                                                                                                                                                                                                                                                                                                                                                                                                                                                                      |
| Date Submitted by the Author: | 26-May-2021                                                                                                                                                                                                                                                                                                                                                                                                                                                                                                                                                                                                                                                                                                                                                                                                                                                                                                                                                                                                                                                                                                                                                                                                                                                                   |
| Complete List of Authors:     | Okpechi, Ikechi G ; University of Cape Town Faculty of Health Sciences, Division of Nephrology and Hypertension; University of Alberta Faculty of Medicine & Dentistry<br>Caskey, Fergus; North Bristol NHS Trust, Richard Bright Renal Unit; UK Renal Registry<br>Gaipov, Abdushappar; Nazarbayev University School of Medicine, Department of Medicine<br>Tannor, Elliot; Komfo Anokye Teaching Hospital, Department of Medicine<br>Hamonc, Laura; University of Alberta, John W. Scott Health Sciences Library<br>Ashuntantang, Gloria; University of Yaounde I, Department of Internal Medicine and Subspecialties<br>Donner, Jo-Ann; International Society of Nephrology<br>Figueiredo, Ana; Pontifícia Universidade Católica do Rio Grande do Sul<br>Inagi, Reiko; The University of Tokyo Graduate School of Medicine Faculty of Medicine<br>Madero, Magdalena; Instituto Nacional de Cardiología Ignacio Chávez<br>Malik, Charu; International Society of Nephrology<br>Moorthy, Monica; International Society of Nephrology<br>Pecoits-Filho, Roberto ; Arbor Research Collaborative for Health, Tesar, Vladimir<br>Levin, Adeera; The University of British Columbia Faculty of Medicine, Medicine<br>Jha, Vivekanand; The George Institute for Global Health India |
| Keywords:                     | Chronic renal failure < NEPHROLOGY, End stage renal failure < NEPHROLOGY, Adult nephrology < NEPHROLOGY, EPIDEMIOLOGY                                                                                                                                                                                                                                                                                                                                                                                                                                                                                                                                                                                                                                                                                                                                                                                                                                                                                                                                                                                                                                                                                                                                                         |
|                               |                                                                                                                                                                                                                                                                                                                                                                                                                                                                                                                                                                                                                                                                                                                                                                                                                                                                                                                                                                                                                                                                                                                                                                                                                                                                               |

SCHOLARONE™  
Manuscripts

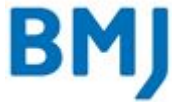

I, the Submitting Author has the right to grant and does grant on behalf of all authors of the Work (as defined in the below author licence), an exclusive licence and/or a non-exclusive licence for contributions from authors who are: i) UK Crown employees; ii) where BMJ has agreed a CC-BY licence shall apply, and/or iii) in accordance with the terms applicable for US Federal Government officers or employees acting as part of their official duties; on a worldwide, perpetual, irrevocable, royalty-free basis to BMJ Publishing Group Ltd ("BMJ") its licensees and where the relevant Journal is co-owned by BMJ to the co-owners of the Journal, to publish the Work in this journal and any other BMJ products and to exploit all rights, as set out in our [licence](#).

The Submitting Author accepts and understands that any supply made under these terms is made by BMJ to the Submitting Author unless you are acting as an employee on behalf of your employer or a postgraduate student of an affiliated institution which is paying any applicable article publishing charge ("APC") for Open Access articles. Where the Submitting Author wishes to make the Work available on an Open Access basis (and intends to pay the relevant APC), the terms of reuse of such Open Access shall be governed by a Creative Commons licence – details of these licences and which [Creative Commons](#) licence will apply to this Work are set out in our licence referred to above.

Other than as permitted in any relevant BMJ Author's Self Archiving Policies, I confirm this Work has not been accepted for publication elsewhere, is not being considered for publication elsewhere and does not duplicate material already published. I confirm all authors consent to publication of this Work and authorise the granting of this licence.

**Title:** Assessing the impact of screening, early identification, and intervention programs for CKD: Protocol for a scoping review.

**Authors:** Ikechi G. Okpechi;<sup>1,2,3</sup> Fergus J. Caskey;<sup>4</sup> Abduzhappar Gaipov;<sup>5</sup> Elliot K. Tannor;<sup>6,7</sup> Laura N. Hamonic;<sup>8</sup> Gloria Ashuntantang;<sup>9</sup> Jo-Ann Donner;<sup>10</sup> Ana Figueiredo;<sup>11</sup> Reiko Inagi;<sup>12</sup> Magdalena Madero;<sup>13</sup> Charu Malik;<sup>10</sup> Monica Moorthy;<sup>10</sup> Roberto Pecoits-Filho;<sup>14</sup> Vladimir Tesar;<sup>15</sup> Adeera Levin;<sup>16</sup> Vivekanand Jha.<sup>17,18,19</sup>

**Affiliations:**

1 – Department of Medicine, University of Alberta, Edmonton, Canada

2 – Division of Nephrology and Hypertension, University of Cape Town, Cape Town, South Africa

3 – Kidney and Hypertension Research unit, University of Cape Town, Cape Town, South Africa

4 – Department of Medicine, Population Health Sciences, Bristol Medical School, University of Bristol, Bristol, UK

5 – Department of Medicine, Nazarbayev University School of Medicine, Nur-Sultan, Kazakhstan

6 – Renal Unit, Department of Medicine, Komfo Anokye Teaching Hospital, Kumasi, Ghana.

7 – Department of Medicine, Kwame Nkrumah University of Science and Technology, Kumasi, Ghana

8 – John W. Scott Health Sciences Library, University of Alberta, Edmonton, Alberta, Canada

9 – Department of Internal Medicine and Specialties, Faculty of Medicine and Biomedical Sciences, University of Yaoundé 1, Yaoundé, Cameroon

10 – International Society of Nephrology, Brussels, Belgium.

11- School of Health Science – Nursing School, Pontifícia Universidade Católica do Rio Grande do Sul (PUCRS), Porto Alegre, Brazil.

12 – Division of Chronic Kidney Disease Pathophysiology, The University of Tokyo Graduate School of Medicine, 7-3-1 Hongo, Bunkyo-ku, Tokyo, 113-8655, Japan.

13 – Department of Medicine, Division of Nephrology, Instituto Nacional de Cardiología Ignacio Chávez, Mexico City, Mexico.

14 – Department of Medicine, School of Medicine, Pontifícia Universidade Católica do Paraná (PUCPR), Curitiba, Brazil.

15 – Department of Nephrology, 1st Faculty of Medicine, General University Hospital, Charles University, Prague, Czechia.

16 – Division of Nephrology, University of British Columbia, Vancouver, British Columbia, Canada.

17 – George Institute for Global Health, UNSW, New Delhi, India.

18 – School of Public Health, Imperial College, London, United Kingdom.

19 – Manipal Academy of Higher Education, Manipal, India.

1  
2  
3 **Corresponding author:**  
4

5 **Name:** Ikechi G. Okpechi  
6

7 **Address:** Division of Nephrology, University of Cape Town, South Africa  
8

9 **Email:** [ikechi.Okpechi@uct.ac.za](mailto:ikechi.Okpechi@uct.ac.za)  
10

11 **Abstract word count: (251)**  
12

13 **Manuscript word count: (2,841)**  
14

15 **Running Title:** CKD screening and early identification programs  
16

17 **Keywords:** chronic kidney disease, early identification, implementation, interventions,  
18 screening,  
19  
20  
21  
22  
23  
24  
25  
26  
27  
28  
29  
30  
31  
32  
33  
34  
35  
36  
37  
38  
39  
40  
41  
42  
43  
44  
45  
46  
47  
48  
49  
50  
51  
52  
53  
54  
55  
56  
57  
58  
59  
60

**Abstract:**

## ***Introduction***

Chronic kidney disease (CKD) is a major threat to public health, especially in low-income and lower-middle-income countries where resources for treating patients with advanced CKD are scarce. Although early CKD identification and intervention holds promise for reducing the burden of CKD and risk factors, it remains unclear if a uniform strategy can be applicable across all income groups. The aim of this scoping review is to provide an overview of all screening attempts and identify components of such programs to advance screening toolkits for CKD based on income group.

## ***Methods and analysis***

This review will be guided by the methodological framework for conducting scoping studies developed by Arksey and O'Malley. Empirical (Medline, Embase, Cochrane Library, CINAHL, ISI Web of Science and PsycINFO) and grey literature references will be searched to identify studies on CKD screening, early identification, and interventions across all populations. Two reviewers will independently screen references in consecutive stages of title/abstract screening and then full-text screening. We will utilize a general descriptive overview, tabular summaries, and content analysis on extracted data.

## ***Ethics and dissemination***

The findings from our planned scoping review will enable us to identify items in early identification programs that can be used in advancing screening toolkits for CKD. We will disseminate our findings using traditional approaches that includes open-access peer-reviewed publication, scientific presentations, and a white paper (call to action) report. Ethical approval will not be required for this scoping review as the data will be extracted from already published studies.

## **Strengths and limitations of this protocol:**

- 1  
2  
3 • This study will provide a comprehensive overview (where, when, why, how, and  
4 who) of all attempts to screen people for CKD.  
5  
6  
7
- 8  
9  
10 • This study will be able to identify proportion of studies that utilized interventions  
11 following CKD identification, the types of interventions that were used, and the types  
12 of programs more likely to use interventions.  
13  
14  
15
- 16  
17  
18 • Our study findings will provide information on screening efforts that have been  
19 successfully evidenced by utilization of various interventions as well as programs that  
20 have become implemented / integrated as health policies.  
21  
22  
23
- 24  
25  
26 • This study will also identify international variations and components of successful  
27 screening / early identification programs to be used for advancing a CKD screening  
28 toolkit for countries in different income groups.  
29  
30  
31
- 32  
33  
34 • A potential limitation of this study could include our inability to access policy  
35 documents related to implementation of screening and early detection programs,  
36 particularly in low-income and lower-middle income countries.  
37  
38  
39  
40  
41  
42  
43  
44  
45  
46  
47  
48  
49  
50  
51  
52  
53  
54  
55  
56  
57

## 58 Introduction

59  
60

1  
2  
3 Worldwide, the burden of chronic kidney disease (CKD) continues to rise. This is  
4 evidenced by its climb in ranking of global causes of death from 17<sup>th</sup> in 1990 to 12<sup>th</sup> in 2017  
5 when the global prevalence of CKD was 697.5 million with an estimated 1.2 million deaths.<sup>1</sup>  
6  
7 More recently, the World Health Organization (WHO) ranked CKD as the 10<sup>th</sup> commonest  
8 cause of death.<sup>2</sup> It is currently the 3<sup>rd</sup> fastest growing cause of death and, according to  
9  
10 projections, will become the 5<sup>th</sup> commonest cause of years of life lost (YLL), rising from 16<sup>th</sup>  
11 in 2016.<sup>3</sup> Even more alarmingly, most of this growth is projected to be in low-income and  
12  
13 lower-middle-income countries (LLMICs) where access to care is significantly limited.<sup>1,4</sup>  
14  
15  
16  
17  
18  
19  
20  
21  
22  
23

24 Although cost,<sup>4-6</sup> workforce,<sup>7</sup> leadership,<sup>8,9</sup> and organization of care<sup>10</sup> represent major  
25 barriers to accessing kidney care in LLMICs, the impact of cost of care and excessive out-of-  
26 pocket payment systems affect the people directly and are more devastating. While  
27  
28 governments pay for dialysis in high-income countries (HICs), patients in LLMICs often  
29  
30 have to partly or fully cover the cost of treatment out-of-pocket. One study has estimated that  
31  
32 the annual cost of providing hemodialysis (HD) in Kenya, Nigeria and Senegal to be  
33  
34 (International dollar) Int\$1.7 billion, Int\$3.5 billion, and Int\$450 million respectively,  
35  
36 equivalent to 15.2%, 55.8% and 35.8% of the total domestic government health expenditure  
37  
38 of those countries.<sup>6</sup> The annual cost of HD in Nepal is about \$2,500, far higher than the  
39  
40 minimum wage.<sup>11</sup> Moreover, CKD, even in early stages, massively increases the risk of  
41  
42 development of cardiovascular disease (CVD).<sup>12,13</sup> In addition, other modalities of kidney  
43  
44 replacement therapies (KRT – i.e. peritoneal dialysis [PD] and kidney transplantation [KT])  
45  
46 are unavailable in many LLMICs. Compared to HICs, PD and KT availability was very low  
47  
48 in low-income countries: 0.9 per million population [pmp] versus 53.0 pmp<sup>14</sup> and 23%  
49  
50 countries versus 89% countries, respectively.<sup>4</sup>  
51  
52  
53  
54  
55  
56  
57  
58  
59  
60



1  
2  
3  
4  
5  
6 The massive cost of KRT suggests the need to prioritize preventive strategies to delay  
7 kidney failure, rather than expand dialysis services.<sup>6</sup> This requires implementation of efficient  
8 and cost-effective screening and early detection and treatment programs to delay progression  
9 of kidney disease.<sup>15-17</sup> A few studies have shown that this is indeed possible. Out of 20,811  
10 individuals screened for CKD in Nepal<sup>18</sup>, 4471 were found to have hypertension, diabetes,  
11 proteinuria, or impaired kidney function. After 3 years of treatment with low-cost anti-  
12 hypertensive medications, anti-diabetic medications or ACE-inhibitors, 63 % of dipstick  
13 positive proteinuria had decreased to normal and 48 % of those with mildly to moderately  
14 impaired kidney function at baseline had stabilized or improved, highlighting the impact of  
15 early disease detection for reducing or halting CKD progression and cardiovascular morbidity  
16 and mortality in such settings.<sup>18</sup>

17  
18  
19  
20  
21  
22  
23  
24  
25  
26  
27  
28  
29  
30  
31  
32  
33 Screening and early identification programs are also used in HICs to assess disease  
34 burden and institute measures to improve kidney health, prevent dialysis and improve  
35 cardiovascular outcomes.<sup>19-22</sup> However, these measures have sometimes been criticized as  
36 ineffective as they show no overall benefits<sup>23</sup> or are not cost-effective.<sup>24,25</sup>

37  
38  
39  
40  
41  
42  
43  
44  
45 The concept of prevention being better than cure is not new – but preventive measures  
46 are more effective if directed at those identified to be in danger of harm. Intuitively,  
47 screening, and early CKD detection, should lead to better outcomes as patients and their care  
48 givers are able to apply measures to retard progression and improve outcomes; however, this  
49 has not always been the case, and has prompted the age-old nephrology debate “To Screen or  
50 not to Screen?”.<sup>25-27</sup> In many instances, attempts to determine CKD prevalence, increase  
51 awareness, and determine cardiovascular risk through screening or early detection programs,  
52  
53  
54  
55  
56  
57  
58  
59  
60

1  
2  
3 have not been coupled with follow-up actions.<sup>28</sup> The futility and possible harms of screening  
4  
5 for CKD without availability of treatment have been pointed out.<sup>29</sup> Other programs have  
6  
7 included interventions, e.g. referral to nephrology<sup>30-32</sup> or commencing specific therapies<sup>33,34</sup>  
8  
9 when CKD or risk factors were detected. Despite these, various questions persist regarding  
10  
11 the usefulness and methodology of CKD screening programs (Table 1).<sup>15,26,29,35,36</sup> As these  
12  
13 questions linger, there remains limited evidence to guide choices and decisions about  
14  
15 screening which continues to be based on available local and regional resources as well as the  
16  
17 cultural acceptability of modality of screening. An initial approach with risk scores and  
18  
19 questionnaires to identify high-risk individuals appears to be potentially useful for large-scale  
20  
21 screening. However, available models for risk prediction and CKD progression are largely  
22  
23 based on European or North American populations and often require measuring biomarkers.  
24  
25 This is a major inconvenience in many LLMICs where laboratory testing is not readily  
26  
27 available.<sup>15</sup>  
28  
29  
30  
31  
32  
33  
34

35  
36 These persistent questions led to a controversies conference on “early identification  
37  
38 and interventions in CKD” organized by Kidney Disease Improving Global Outcomes  
39  
40 (KDIGO) after which a consensus emerged that CKD screening coupled with risk  
41  
42 stratification and treatment should be implemented in primary or community care settings for  
43  
44 high-risk persons.<sup>37</sup> Major nephrology groups and regional bodies of nephrology have also  
45  
46 developed guidelines for CKD screening tailored to their population with differences arising  
47  
48 around who to test (general public *versus* those at risk), recommended tests to use (urine  
49  
50 protein *versus* serum creatinine *versus* cystatin C assays) and frequency of testing (once  
51  
52 annually *versus* more than once annually).<sup>38-40</sup> As most of the recommendations are largely  
53  
54 based on evidence from observational studies (there are no randomized controlled studies  
55  
56 assessing the benefits or harms of screening), selective approaches have been used in making  
57  
58  
59  
60

1  
2  
3 recommendations for screening in different income groups and populations, including CKD  
4  
5 hotspots.<sup>29</sup>  
6  
7  
8  
9

10 Due to the weak and observational nature of the evidence base, guidelines that have  
11 made recommendations have tended not to be readily accepted, based on the degree of  
12 uncertainty and the magnitude of impact of kidney disease on public health. In 2012, the  
13 report of a systematic review on CKD screening and monitoring conducted for the United  
14 States Preventive Services Task Force (USPSTF) and the American College of Physicians  
15 (ACP) did not recommend CKD screening in asymptomatic adults without risk factors as no  
16 direct evidence was found that such screening improved outcomes.<sup>23</sup> The American Society  
17 of Nephrology (ASN) countered this with a strong recommendation to continue regular  
18 screening for kidney disease, regardless of an individual's risk factors.<sup>41</sup>  
19  
20  
21  
22  
23  
24  
25  
26  
27  
28  
29  
30  
31  
32

33 Lack of awareness of CKD is still perceived as a significant challenge to tackling the  
34 public health problems of CKD, particularly in LLMIC where most individuals with CKD  
35 remain undetected until they have progressed to kidney failure.<sup>42</sup> Population-wide studies in  
36 high-risk individuals have reported high prevalence and low awareness of CKD.<sup>43-45</sup> In  
37 Mexico, of 1,519 participants of a CKD screening program, only 1% of those with CKD were  
38 aware, despite 71% having visited a physician in the preceding year.<sup>44</sup> However, recent data  
39 from participants with CKD in the REasons for Geographic And Racial Differences in Stroke  
40 (REGARDS) study, a national, longitudinal, population-based cohort did not show an  
41 association between awareness of CKD with odds of subsequent changes in health behaviors,  
42 CKD management indicators, or changes in eGFR and urine albumin-creatinine ratio  
43 (UACR).<sup>46</sup> The study concluded that clinician education needs to be coupled with  
44  
45  
46  
47  
48  
49  
50  
51  
52  
53  
54  
55  
56  
57  
58  
59  
60

1  
2  
3 interventions to increase popular awareness of CKD for optimal impact on health behaviors  
4  
5 and chronic disease management indicators.  
6  
7  
8  
9

10 As these controversies continue and given the large body of literature on screening,  
11 early identification programs, and interventions in CKD, we have designed a scoping review  
12 to identify, describe and assess all attempts that have been made to establish CKD early  
13 identification / screening / awareness programs worldwide. Our aim is to provide an overview  
14 of approaches to screen and detect CKD at an early stage and to advance strengths and  
15 weaknesses of such programs into a toolkit that can be used for early identification and  
16 intervention programs in CKD, based on country income groups.  
17  
18  
19  
20  
21  
22  
23  
24  
25  
26  
27

## 28 **Methods and Analysis**

### 29 *Approach*

30  
31 We will be guided by the methodological framework for conducting scoping studies  
32 developed by Arksey and O'Malley in 2005.<sup>47</sup> This framework provided an excellent  
33 foundation for scoping study methodology but has been further enhanced by work done by  
34 others.<sup>48-50</sup> This framework will include five steps (with an optional sixth step): (1)  
35 identifying the research question; (2) identifying the relevant studies; (3) study selection; (4)  
36 charting the data and (5) reporting the results; (6) consultation (optional). We will also utilize  
37 best practices for conducting and reporting systematic reviews (i.e., Preferred Reporting  
38 Items for Systematic Reviews and Meta-Analyses (PRISMA) for Protocols and Scoping  
39 Reviews (PRISMA-ScR) for reporting our findings.<sup>51,52</sup>  
40  
41  
42  
43  
44  
45  
46  
47  
48  
49  
50  
51  
52  
53  
54  
55

### 56 **Stage 1. Identifying the research question**

57  
58  
59  
60

We utilized a comprehensive approach that included screening methods, target population, and interventions utilized in framing our research question: “*What attempts have been made to establish CKD early detection / screening / awareness programs?*”. Using key themes in the conclusions from KDIGO<sup>37</sup> and to be able to fully answer the main study question, other questions will need to be addressed, including:

1. *What populations have been screened for CKD and what risk stratification has been included in screening?*
2. *What measurements methods have been used to screen for CKD?*
3. *What secondary preventive interventions have been utilized in those identified with CKD?*
4. *What efforts have been made to implement or integrate CKD screening programs into health system?*

We believe that answering these questions will enable us to identify all potential components required to launch and sustain a CKD screening or early detection program.

## **Stage 2. Identifying the relevant studies**

Development of the search strategy will aim at getting a comprehensive review of the existing evidence base. We will identify studies through a detailed search (from inception) of the following bibliographic databases: Medline (Ovid), Embase (Ovid), Cochrane Library, CINAHL, ISI Web of Science and PsycINFO. We will also search grey literature (including ProQuest Dissertations & Theses Global, and Conference Proceedings Citation Index [Clarivate Analytics]) using recommended resources in consultation with our medical librarian (LH). We have developed the search strategy to be used in Medline (Table 2) and will adapt this strategy for other databases. The search strategy includes subject headings, related terms and key words necessary for the research question. We will use Boolean logic

1  
2  
3 and operators (ie, ‘AND’, ‘OR’, ‘NOT’) to combine and refine search terms. Given the  
4  
5 complexities associated with implementing CKD early identification programs, and that post-  
6  
7 program implementation policies may not have been included in primary publications, we  
8  
9 will search for secondary publications and documents and where necessary contact authors of  
10  
11 selected studies to ascertain if such programs became health policy.  
12  
13  
14  
15  
16

### 17 **Stage 3. Study selection**

18  
19 We will include studies that report the results of CKD screening. We will group the  
20  
21 studies based on the World Bank country income groups and type of screening. Two  
22  
23 reviewers (EKT and AG) will independently screen all identified citations for potential  
24  
25 inclusion. When agreement on a citation cannot be reached between the two reviewers, a  
26  
27 third reviewer (MM) will be consulted for reconciliation. The review process will first  
28  
29 involve screening of the titles and abstracts and then a detailed review of all selected full texts  
30  
31 to ascertain eligibility for inclusion (Figure 1). An article will be included if it meets the  
32  
33 following criteria:  
34  
35  
36  
37  
38  
39

- 40 • **Population:** Studies that provided results of CKD screening (with or without an  
41  
42 intervention) carried out in any adult ( $\geq 18$  years) population. For studies in the same  
43  
44 population with multiple years of publications, the result of the latest study will be  
45  
46 used, and studies conducted across multiple countries will be reported as  
47  
48 “multinational” with the list of participating countries provided.
- 49 • **Intervention:** CKD screening, or CKD early detection programs, or CKD awareness  
50  
51 programs.
- 52 • **Comparator:** Standard of care (if applicable)  
53  
54  
55  
56  
57  
58  
59  
60

- **Outcomes:** CKD early identification programs / studies reporting at least one of the following: CKD detection rate (with or without risk factor detection rate), methods utilized for screening, people who carried out the screening, interventions utilized (e.g. proportion referred to nephrology clinics, proportion that started treatment, etc), cost-effectiveness of the program, and CKD screening policies implemented.
- **Study design:** all screening study designs that reported at least one of the outcomes.
- **Limits:** All databases will be searched from inception with no language restrictions.

The following studies will be excluded:

- Screening studies in children
- Screening studies for acute kidney injury (AKI), urological diseases (e.g. prostate cancer awareness programs), or CKD risk factors (e.g. hypertension and diabetes), if no attempt was made to specifically screen for CKD.
- Organ donor screening or awareness programs
- Review articles, editorials, commentaries, letters to the editor, and guidelines and recommendations on CKD screening.

#### Stage 4. Data Extraction

Results of the search will be collated in a Microsoft Excel spreadsheet. We will follow recommended data charting methods<sup>47</sup> to capture relevant details for included studies (Table 3). The data items collected will follow 4 themes: (i) population screened and screening methods used (e.g., duration of screening, country of study, type of program: “national” or “other”, screening type: mass (community-based) / targeted (within a known CKD risk factor cohort), workforce involved in screening, repeat evaluation, motivation for the program (e.g., World Kidney Day program, public health concerns for rising kidney

1  
2  
3 disease, etc.), (ii) measurements utilized for assessing CKD (e.g. urine dipsticks, serum  
4 creatinine, eGFR, etc.), (iii) interventions utilized in those identified with CKD (e.g. referral  
5 to nephrology or specialist care, initiation of specific treatment (lifestyle measures, ACE-  
6 inhibitors, attempts to follow up patients offered interventions, etc.), and (iv) health systems  
7 and economic factors associated with screening (e.g. implementation programs, cost-  
8 effectiveness, etc.). All extracted data will be reviewed for accuracy and completeness.  
9  
10  
11  
12  
13  
14  
15  
16  
17  
18

### 19 **Stage 5. Collating, summarizing, and reporting of the results**

20  
21 We will follow recommendations to extend the scoping review process by adding  
22 thematic analysis.<sup>48</sup> Hence, extracted data will be analysed qualitatively using both deductive  
23 (pre-identified themes) and inductive (new identified themes) approaches. These approaches  
24 will enable us to answer the broad research question and allow us to expand our response  
25 with new findings that were not previously included. Although specific data (e.g. CKD  
26 detection rate) will be collected, such data will not be pooled for further analysis. Textual  
27 data from included papers will be coded individually using simple “yes” or “no” responses  
28 and other broad-based coding scheme by (EKT) and (AG) to look for common themes across  
29 papers. We will present overall results using percentages of “yes” responses.  
30  
31  
32  
33  
34  
35  
36  
37  
38  
39  
40  
41  
42  
43  
44

### 45 **Stage 6. Consultation exercise**

46  
47 Consultation is an optional part of conducting a scoping review, however, where  
48 necessary, we will contact primary authors, regional nephrology leaders or Departments /  
49 Ministries of Health for policy documents on implementation of CKD screening programs.  
50  
51  
52  
53  
54  
55

### 56 **Patient and public involvement**

57  
58 Patients and the public will not be involved in any stage of the project.  
59  
60



## Discussion, Ethics, and dissemination

The findings from our planned scoping review will enable us to identify items in screening and early identification programs that can be used in advancing screening toolkits for CKD. The results will also enable us to understand what is feasible and the capacity of countries in different income groups for conducting and sustaining screening programs. Various reviews and recommendations have suggested using different screening approaches in LLMICs given the lack of capacity to integrate identified CKD cases into the broader health system and the general lack of capacity to measure the quality of care in existing CKD cases.<sup>29,37</sup> Thus, based on our results, this scoping review will be able to suggest components for consideration for inclusion in screening toolkits for countries in different income groups, though these are likely to need testing for effectiveness. Furthermore, we anticipate that this scoping review will likely lead to more specific questions (e.g. how sensitive and specific are urine dipsticks findings for screening?) that require detailed interrogation through systematic reviews or randomized controlled study designs. A potential limitation of this scoping review could be our inability to access policy documents backing the implementation / integration strategies of early identification programs to health systems, particularly in LLMICs. We hope that by contacting nephrology leaders and experts in those regions, we will be able to obtain information on the availability of such policy documents. Finally, ethical approval will not be needed for this study as data used will be extracted from already published studies. Our dissemination strategy will use traditional approaches, including open-access peer-reviewed publication(s), scientific presentations, and a report.

**Author contributions:**

VJ, AL, IGO, and FJC conceived the study design. The first version of the protocol was drafted by IGO and was revised by FJC, AG, EKT, LNH, GA, AF, RI, MM, CM, MM, RP-F, VT, AL, and VJ. The search strategy was developed and performed by LNH. AG and EKT will perform the screening, study selection and collect data from all included studies and MM will adjudicate any conflicts in study selection. All authors revised and critically reviewed this manuscript and approved the final version.

**Funding:**

International Society of Nephrology (ISN)

**Competing interests:**

RP-F reports grants from Fresenius Medical Care, provides scientific leadership to George Clinical, and consultancy fees for Astra Zeneca, B-I, Bayer, Akebia, Novo Nordisk, all paid to his institution, outside the submitted work. VT reports consultancy fee from Boehringer-Ingelheim, Calliditas, Fresenius Medical Care, Novartis and Traverso. VJ reports grants from GlaxoSmithKline and Baxter Healthcare, provides scientific leadership to George Clinical, and consultancy fees for Biocon, Zudis Cadilla, and NephroPlus, all paid to his institution, outside the submitted work.

**Patient consent:**

Not required.

**Data sharing statement:**

We will make data available on request

## References

1. GBD Chronic Kidney Disease Collaboration. Global, regional, and national burden of chronic kidney disease, 1990-2017: a systematic analysis for the Global Burden of Disease Study 2017. *Lancet (London, England)*. 2020;395(10225):709-733.
2. World Health Organization. The top 10 causes of death. <https://www.who.int/news-room/fact-sheets/detail/the-top-10-causes-of-death>. Published 2020. Accessed 19 March 2021.
3. Foreman KJ, Marquez N, Dolgert A, et al. Forecasting life expectancy, years of life lost, and all-cause and cause-specific mortality for 250 causes of death: reference and alternative scenarios for 2016-40 for 195 countries and territories. *Lancet (London, England)*. 2018;392(10159):2052-2090.
4. Bello AK, Levin A, Lunney M, et al. Status of care for end stage kidney disease in countries and regions worldwide: international cross sectional survey. *Bmj*. 2019;367:l5873.
5. Tang SCW, Yu X, Chen HC, et al. Dialysis Care and Dialysis Funding in Asia. *American journal of kidney diseases : the official journal of the National Kidney Foundation*. 2020;75(5):772-781.
6. Crosby L, Baker P, Hangoma P, Barasa E, Hamidi V, Chalkidou K. Dialysis in Africa: the need for evidence-informed decision making. *The Lancet Global health*. 2020;8(4):e476-e477.
7. Riaz P, Caskey F, McIsaac M, et al. Workforce capacity for the care of patients with kidney failure across world countries and regions. *BMJ Glob Health*. 2021;6(1).
8. Bello AK, Alrukhaimi M, Ashuntantang GE, et al. Global overview of health systems oversight and financing for kidney care. *Kidney Int Suppl (2011)*. 2018;8(2):41-51.
9. Lunney M, Alrukhaimi M, Ashuntantang GE, et al. Guidelines, policies, and barriers to kidney care: findings from a global survey. *Kidney Int Suppl (2011)*. 2018;8(2):30-40.
10. Htay H, Alrukhaimi M, Ashuntantang GE, et al. Global access of patients with kidney disease to health technologies and medications: findings from the Global Kidney Health Atlas project. *Kidney International Supplements*. 2018;8(2):64-73.
11. Divyaveer SS, Ramachandran R, Sahay M, et al. International Society of Nephrology Global Kidney Health Atlas: structures, organization, and services for the management of kidney failure in South Asia. *Kidney International Supplements*. 2021;11(2):e97-e105.
12. Jankowski J, Floege J, Fliser D, Böhm M, Marx N. Cardiovascular Disease in Chronic Kidney Disease: Pathophysiological Insights and Therapeutic Options. *Circulation*. 2021;143(11):1157-1172.
13. Gansevoort RT, Correa-Rotter R, Hemmelgarn BR, et al. Chronic kidney disease and cardiovascular risk: epidemiology, mechanisms, and prevention. *Lancet (London, England)*. 2013;382(9889):339-352.
14. Cho Y, Bello AK, Levin A, et al. Peritoneal Dialysis Use and Practice Patterns: An International Survey Study. *American journal of kidney diseases : the official journal of the National Kidney Foundation*. 2021;77(3):315-325.
15. George C, Mogueo A, Okpechi I, Echouffo-Tcheugui JB, Kengne AP. Chronic kidney disease in low-income to middle-income countries: the case for increased screening. *BMJ Glob Health*. 2017;2(2):e000256.
16. Perico N, Plata R, Anabaya A, et al. Strategies for national health care systems in emerging countries: the case of screening and prevention of renal disease progression in Bolivia. *Kidney international Supplement*. 2005(97):S87-94.

17. Perico N, Remuzzi G. Prevention programs for chronic kidney disease in low-income countries. *Intern Emerg Med*. 2016;11(3):385-389.
18. Sharma SK, Ghimire A, Carminati S, Remuzzi G, Perico N. Management of chronic kidney disease and its risk factors in eastern Nepal. *The Lancet Global health*. 2014;2(9):e506-e507.
19. Gansevoort RT, Verhave JC, Hillege HL, et al. The validity of screening based on spot morning urine samples to detect subjects with microalbuminuria in the general population. *Kidney international Supplement*. 2005(94):S28-35.
20. Coresh J, Astor BC, Greene T, Eknoyan G, Levey AS. Prevalence of chronic kidney disease and decreased kidney function in the adult US population: Third National Health and Nutrition Examination Survey. *American journal of kidney diseases : the official journal of the National Kidney Foundation*. 2003;41(1):1-12.
21. Komenda P, Lavalley B, Ferguson TW, et al. The prevalence of CKD in rural Canadian indigenous peoples: results from the First Nations Community Based Screening to Improve Kidney Health and Prevent Dialysis (FINISHED) screen, triage, and treat program. *American journal of kidney diseases : the official journal of the National Kidney Foundation*. 2016;68(4):582-590.
22. Takahashi S, Okada K, Yanai M. The Kidney Early Evaluation Program (KEEP) of Japan: results from the initial screening period. *Kidney international Supplement*. 2010(116):S17-23.
23. Fink HA, Ishani A, Taylor BC, et al. Screening for, monitoring, and treatment of chronic kidney disease stages 1 to 3: a systematic review for the U.S. Preventive Services Task Force and for an American College of Physicians Clinical Practice Guideline. *Annals of internal medicine*. 2012;156(8):570-581.
24. Manns B, Hemmelgarn B, Tonelli M, et al. Population based screening for chronic kidney disease: cost effectiveness study. *Bmj*. 2010;341:c5869.
25. Qaseem A, Wilt TJ, Cooke M, Denberg TD. The paucity of evidence supporting screening for stages 1-3 CKD in asymptomatic patients with or without risk factors. *Clinical journal of the American Society of Nephrology : CJASN*. 2014;9(11):1993-1995.
26. Klinger AS. Screening for CKD: a pro and con debate. *Clinical journal of the American Society of Nephrology : CJASN*. 2014;9(11):1987.
27. Berns JS. Routine screening for CKD should be done in asymptomatic adults... selectively. *Clinical journal of the American Society of Nephrology : CJASN*. 2014;9(11):1988-1992.
28. Cepoi V, Onofriescu M, Segall L, Covic A. The prevalence of chronic kidney disease in the general population in Romania: a study on 60,000 persons. *Int Urol Nephrol*. 2012;44(1):213-220.
29. Tonelli M, Dickinson JA. Early Detection of CKD: Implications for Low-Income, Middle-Income, and High-Income Countries. *Journal of the American Society of Nephrology : JASN*. 2020;31(9):1931-1940.
30. Garcia-Garcia G, Marquez-Magaña I, Renoirte-Lopez K, et al. Screening for kidney disease on World Kidney Day in Jalisco, Mexico. *J Nephrol*. 2010;23(2):224-230.
31. Galbraith LE, Ronksley PE, Barnieh LJ, et al. The See Kidney Disease Targeted Screening Program for CKD. *Clinical journal of the American Society of Nephrology : CJASN*. 2016;11(6):964-972.
32. Gayoso-Diz P, Otero-González A, Rodríguez-Álvarez MX, García F, González-Quintela A, Martín de Francisco AL. Strategy to estimate risk progression of chronic kidney disease, cardiovascular risk, and referral to nephrology: the EPIRCE Study.

- Nefrologia : publicacion oficial de la Sociedad Espanola Nefrologia*. 2013;33(2):223-230.
33. Sharma SK, Zou H, Togtokh A, et al. Burden of CKD, proteinuria, and cardiovascular risk among Chinese, Mongolian, and Nepalese participants in the International Society of Nephrology screening programs. *American journal of kidney diseases : the official journal of the National Kidney Foundation*. 2010;56(5):915-927.
  34. Diercks GF, Janssen WM, van Boven AJ, et al. Rationale, design, and baseline characteristics of a trial of prevention of cardiovascular and renal disease with fosinopril and pravastatin in nonhypertensive, nonhypercholesterolemic subjects with microalbuminuria (the Prevention of RENal and Vascular ENdstage Disease Intervention Trial [PREVEND IT]). *Am J Cardiol*. 2000;86(6):635-638.
  35. Jaar BG, Khatib R, Plantinga L, Boulware LE, Powe NR. Principles of screening for chronic kidney disease. *Clinical journal of the American Society of Nephrology : CJASN*. 2008;3(2):601-609.
  36. de Jong PE, van der Velde M, Gansevoort RT, Zoccali C. Screening for chronic kidney disease: where does Europe go? *Clinical journal of the American Society of Nephrology : CJASN*. 2008;3(2):616-623.
  37. Shlipak MG, Tummalapalli SL, Boulware LE, et al. The case for early identification and intervention of chronic kidney disease: conclusions from a Kidney Disease: Improving Global Outcomes (KDIGO) Controversies Conference. *Kidney Int*. 2021;99(1):34-47.
  38. Johnson DW, Atai E, Chan M, et al. KHA-CARI guideline: Early chronic kidney disease: detection, prevention and management. *Nephrology (Carlton, Vic)*. 2013;18(5):340-350.
  39. National Institute for Health and Care Excellence (NICE). Assessment and monitoring of chronic kidney disease. <http://pathways.nice.org.uk/pathways/chronic-kidney-disease>. Published 2020. Updated 03 December 2020. Accessed 22 April 2021.
  40. National Kidney Foundation. K/DOQI clinical practice guidelines for chronic kidney disease: evaluation, classification, and stratification. *American journal of kidney diseases : the official journal of the National Kidney Foundation*. 2002;39(2 Suppl 1):S1-266.
  41. ASN emphasizes need for early detection of kidney disease, a silent killer [press release]. American Society of Nephrology 2013.
  42. Garcia-Garcia G, Jha V, Li PKT, et al. Chronic kidney disease (CKD) in disadvantaged populations. *Clinical kidney journal*. 2015;8(1):3-6.
  43. Vassalotti JA, Li S, McCullough PA, Bakris GL. Kidney early evaluation program: a community-based screening approach to address disparities in chronic kidney disease. *Seminars in nephrology*. 2010;30(1):66-73.
  44. Obrador GT, García-García G, Villa AR, et al. Prevalence of chronic kidney disease in the Kidney Early Evaluation Program (KEEP) México and comparison with KEEP US. *Kidney Int*. 2010;77:S2-S8.
  45. Liu Q, Li Z, Wang H, et al. High prevalence and associated risk factors for impaired renal function and urinary abnormalities in a rural adult population from southern China. *PLoS One*. 2012;7(10):e47100.
  46. Tummalapalli SL, Vittinghoff E, Crews DC, et al. Chronic Kidney Disease Awareness and Longitudinal Health Outcomes: Results from the REasons for Geographic And Racial Differences in Stroke Study. *Am J Nephrol*. 2020;51(6):463-472.

- 1
- 2
- 3
- 4 47. Arksey H, O'Malley L. Scoping Studies: Towards a Methodological Framework. *International Journal of Social Research Methodology: Theory & Practice*. 2005;8(1):19-32.
- 5
- 6
- 7 48. Levac D, Colquhoun H, O'Brien KK. Scoping studies: advancing the methodology. *Implementation science : IS*. 2010;5:69.
- 8
- 9 49. Colquhoun HL, Levac D, O'Brien KK, et al. Scoping reviews: time for clarity in definition, methods, and reporting. *Journal of clinical epidemiology*. 2014;67(12):1291-1294.
- 10
- 11
- 12 50. Daudt HM, van Mossel C, Scott SJ. Enhancing the scoping study methodology: a large, inter-professional team's experience with Arksey and O'Malley's framework. *BMC medical research methodology*. 2013;13:48.
- 13
- 14
- 15 51. Tricco AC, Lillie E, Zarin W, et al. PRISMA Extension for Scoping Reviews (PRISMA-ScR): Checklist and Explanation. *Annals of internal medicine*. 2018;169(7):467-473.
- 16
- 17
- 18
- 19 52. Peters MDJ GC, McInerney P, Munn Z, Tricco AC, Khalil, H. Chapter 11: Scoping Reviews (2020 version) In: In: Aromataris E MZE, ed. *Joanna Briggs Institute Reviewer's Manual, JBI, 2020*.2020.
- 20
- 21
- 22
- 23
- 24
- 25
- 26
- 27
- 28
- 29
- 30
- 31
- 32
- 33
- 34
- 35
- 36
- 37
- 38
- 39
- 40
- 41
- 42
- 43
- 44
- 45
- 46
- 47
- 48
- 49
- 50
- 51
- 52
- 53
- 54
- 55
- 56
- 57
- 58
- 59
- 60



1  
2  
3 **FIGURE AND TABLE LEGENDS:**  
4

5  
6  
7 **Figure 1:** PRISMA-Flow chart for study selection  
8

9 **Table 1:** Persisting questions on usefulness and methodology of CKD screening programs  
10

11 **Table 2:** Medline search strategy  
12

13 **Table 3:** Data extraction items from empirical literature sources  
14  
15  
16  
17  
18  
19  
20  
21  
22  
23  
24  
25  
26  
27  
28  
29  
30  
31  
32  
33  
34  
35  
36  
37  
38  
39  
40  
41  
42  
43  
44  
45  
46  
47  
48  
49  
50  
51  
52  
53  
54  
55  
56  
57  
58  
59  
60

For peer review only

**Table 1:** Persisting questions on usefulness and methodology of CKD screening programs  
[15,26,29,35,36]

| Questions related to the usefulness of CKD screening                                                                            | Questions related to the methodology of CKD screening                                                                     |
|---------------------------------------------------------------------------------------------------------------------------------|---------------------------------------------------------------------------------------------------------------------------|
| - Should CKD screening be used in an asymptomatic population with or without CKD risk factors such as hypertension or diabetes? | - Are single measurements sufficient for detecting CKD?                                                                   |
| - Are there unique risk factors in some populations we do not know about?                                                       | - Does population screening with serum creatinine and urine protein testing lead to improved outcomes without undue harm? |
| - Should therapies be initiated in those with mildly impaired eGFR or microalbuminuria?                                         | - Should screening be conducted in younger age groups without CKD risk factors?                                           |
| - Does earlier treatment improve the prognosis?                                                                                 | - What threshold of dipsticks positive proteinuria should be considered relevant for screening?                           |
| - Are CKD screening programs cost-effective?                                                                                    | - Who should manage screening and subsequent treatment?                                                                   |
| - Do the potential harms of CKD screening outweigh the benefits?                                                                | - What tests should be selected for CKD screening?                                                                        |
| - What is the yield of the screening service?                                                                                   | - How valid and repeatable is the screening test?                                                                         |
| - What are the implications of CKD screening for public health policy?                                                          |                                                                                                                           |

Abbreviations: CKD – chronic kidney disease; eGFR – estimated glomerular filtration rate



**Table 2:** Medline search strategy

1. exp Renal Insufficiency, Chronic/
2. Chronic Kidney disease\*.mp.
3. chronic kidney insufficienc\*.mp.
4. chronic renal disease\*.mp.
5. chronic renal insufficienc\*.mp.
6. CKD.mp.
7. Renal fail\*.mp.
8. Kidney fail\*.mp.
9. or/1-8
10. Multiphasic Screening/ and (program\* or campaign\* or strateg\* or initiative\*).mp.
11. Mass Screening/
12. (screen\* adj2 (program\* or strateg\* or campaign\* or initiative\*)).mp.
13. (awareness adj3 (program\* or campaign\* or strateg\* or initiative\*)).mp.
14. (detect\* adj3 (program\* or campaign\* or strateg\* or initiative\*)).mp.
15. (National Health and Nutrition Examination Survey).mp.
16. Kidney Early Evaluation Program.mp.
17. (Prevention of Renal and Vascular End-Stage Disease).mp.
18. World Kidney Day.mp.
19. national kidney foundation.mp.
20. (Screening and Early Evaluation of Kidney disease).mp.
21. or/15-20
22. 21 and (screen\* or detect\* or awareness).mp.
23. or/10-14,22
24. 9 and 23
25. ((detect\* or screen\* or awareness) adj2 ("chronic kidney" or "chronic renal")).mp.
26. 24 or 25
27. exp animals/ not humans.sh.
28. 26 not 27

**Table 3:** Data extraction items from empirical literature sources

| Population screened                                                                                                                                                                                                                  | Measurements                          | Interventions                                      | Implementation                                                                               |
|--------------------------------------------------------------------------------------------------------------------------------------------------------------------------------------------------------------------------------------|---------------------------------------|----------------------------------------------------|----------------------------------------------------------------------------------------------|
| Country, income group                                                                                                                                                                                                                | Number of measurements (1x / 2x)      | Lifestyle measures*                                | Cost measures reported                                                                       |
| Type of program (national / others)                                                                                                                                                                                                  | Urine dipsticks (protein $\pm$ blood) | RAAS blockade                                      | Reported to be cost-effective                                                                |
| Demographic features (Age, gender, ethnicity, rural / urban setting)                                                                                                                                                                 | Urine ACR / PCR only                  | Antidiabetic medications (any)                     | Screening strategy adopted or not implemented due to lack of efficacy (e.g. policy document) |
| Workforce involved in screening                                                                                                                                                                                                      | SCR / eGFR only                       | Anti-hypertensive medications (separate from RAAS) |                                                                                              |
| Screening type:                                                                                                                                                                                                                      | Urine + SCR / eGFR                    | Lipid treatment                                    |                                                                                              |
| Mass screening (yes / no)                                                                                                                                                                                                            | POCT                                  | Avoidance of nephrotoxins                          |                                                                                              |
| Targeted screening (yes / no)                                                                                                                                                                                                        | Other tests (e.g. cystatin C)         | Referral to nephrology service                     |                                                                                              |
| <ul style="list-style-type: none"> <li>• Hypertensives</li> <li>• Diabetics</li> <li>• Elderly</li> <li>• Family history of CKD</li> <li>• HIV</li> <li>• Minority group (e.g., Indigenous populations)</li> <li>• Others</li> </ul> | Reported CKD prevalence (yes / no)    | Referral for KRT                                   |                                                                                              |
| Risk factors assessed and reported:                                                                                                                                                                                                  |                                       |                                                    |                                                                                              |
| <ul style="list-style-type: none"> <li>• BP</li> <li>• Blood glucose</li> <li>• Body weight / BMI</li> <li>• Lipids</li> <li>• Others</li> </ul>                                                                                     |                                       |                                                    |                                                                                              |
| Risk stratification (yes / no)                                                                                                                                                                                                       |                                       |                                                    |                                                                                              |

CKD – Chronic kidney disease, HIC – high-income country, UMIC – upper middle-income country, LMIC – lower middle-income country, LIC – low-income country, HIV – human immunodeficiency virus, ACR – albumin-creatinine ratio, PCR – protein creatinine ratio, SCR – serum creatinine, eGFR- estimated glomerular filtration rate, BP – blood pressure, BMI – body mass index, RAAS – renin-angiotensin aldosterone system, KRT – kidney replacement therapy (any of hemodialysis, peritoneal dialysis, kidney transplantation), POCT – point of care test (e.g. saliva), \*(smoking cessation, weight reduction measures, dietary measures, etc.)

Figure 1: PRISMA-Flow chart for study selection

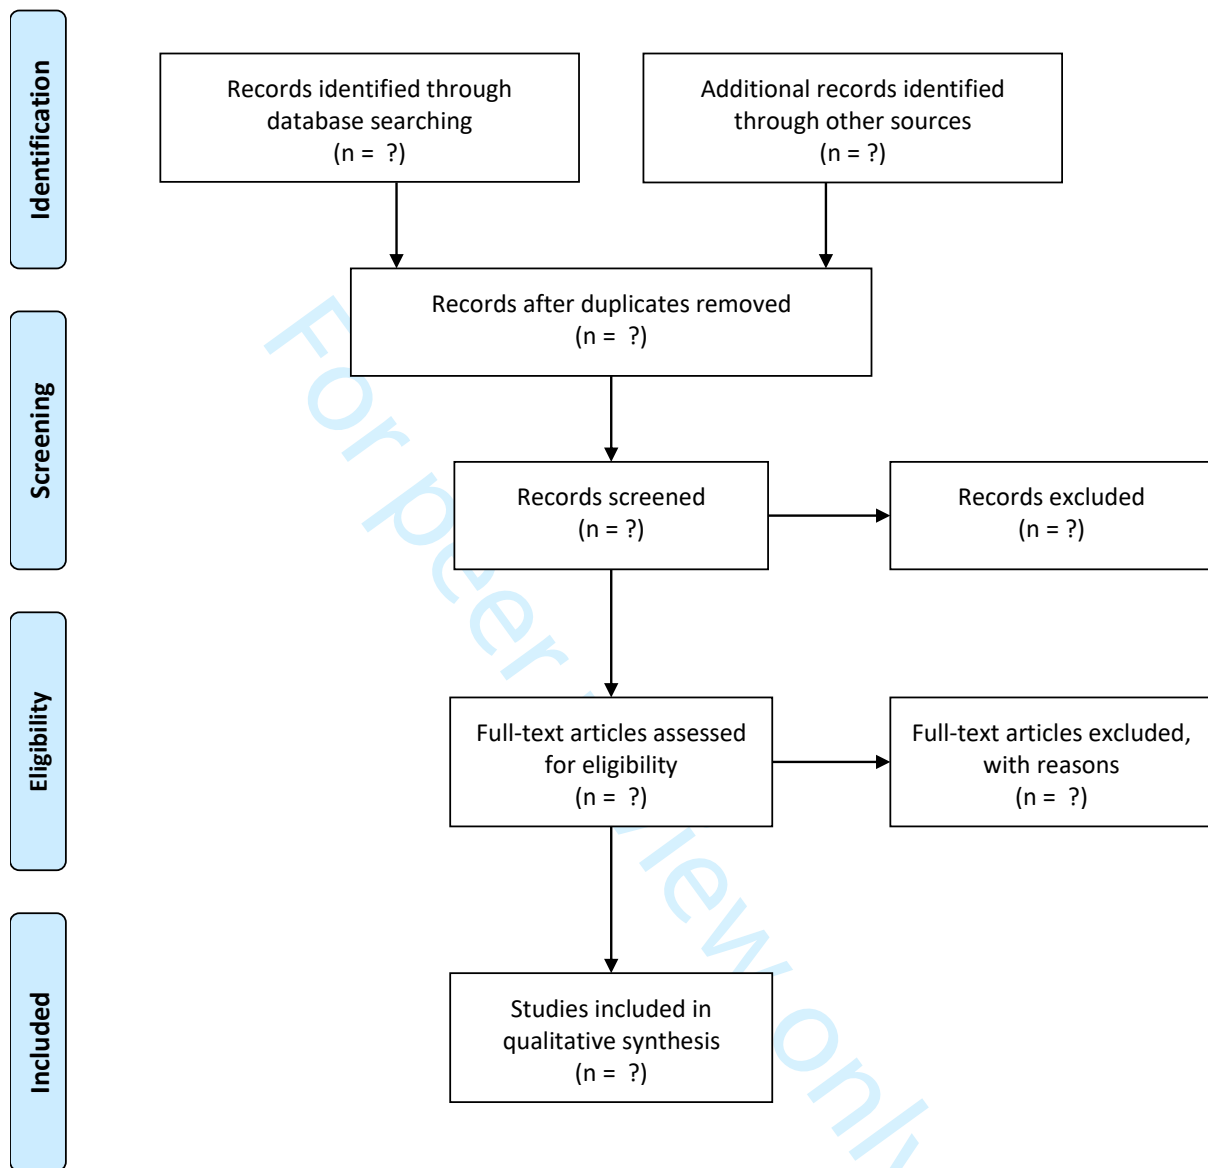

## Preferred Reporting Items for Systematic reviews and Meta-Analyses extension for Scoping Reviews (PRISMA-ScR) Checklist

| SECTION                                               | ITEM | PRISMA-ScR CHECKLIST ITEM                                                                                                                                                                                                                                                                                  | REPORTED ON PAGE # |
|-------------------------------------------------------|------|------------------------------------------------------------------------------------------------------------------------------------------------------------------------------------------------------------------------------------------------------------------------------------------------------------|--------------------|
| <b>TITLE</b>                                          |      |                                                                                                                                                                                                                                                                                                            |                    |
| Title                                                 | 1    | Identify the report as a scoping review.                                                                                                                                                                                                                                                                   |                    |
| <b>ABSTRACT</b>                                       |      |                                                                                                                                                                                                                                                                                                            |                    |
| Structured summary                                    | 2    | Provide a structured summary that includes (as applicable): background, objectives, eligibility criteria, sources of evidence, charting methods, results, and conclusions that relate to the review questions and objectives.                                                                              |                    |
| <b>INTRODUCTION</b>                                   |      |                                                                                                                                                                                                                                                                                                            |                    |
| Rationale                                             | 3    | Describe the rationale for the review in the context of what is already known. Explain why the review questions/objectives lend themselves to a scoping review approach.                                                                                                                                   |                    |
| Objectives                                            | 4    | Provide an explicit statement of the questions and objectives being addressed with reference to their key elements (e.g., population or participants, concepts, and context) or other relevant key elements used to conceptualize the review questions and/or objectives.                                  |                    |
| <b>METHODS</b>                                        |      |                                                                                                                                                                                                                                                                                                            |                    |
| Protocol and registration                             | 5    | Indicate whether a review protocol exists; state if and where it can be accessed (e.g., a Web address); and if available, provide registration information, including the registration number.                                                                                                             |                    |
| Eligibility criteria                                  | 6    | Specify characteristics of the sources of evidence used as eligibility criteria (e.g., years considered, language, and publication status), and provide a rationale.                                                                                                                                       |                    |
| Information sources*                                  | 7    | Describe all information sources in the search (e.g., databases with dates of coverage and contact with authors to identify additional sources), as well as the date the most recent search was executed.                                                                                                  |                    |
| Search                                                | 8    | Present the full electronic search strategy for at least 1 database, including any limits used, such that it could be repeated.                                                                                                                                                                            |                    |
| Selection of sources of evidence†                     | 9    | State the process for selecting sources of evidence (i.e., screening and eligibility) included in the scoping review.                                                                                                                                                                                      |                    |
| Data charting process‡                                | 10   | Describe the methods of charting data from the included sources of evidence (e.g., calibrated forms or forms that have been tested by the team before their use, and whether data charting was done independently or in duplicate) and any processes for obtaining and confirming data from investigators. |                    |
| Data items                                            | 11   | List and define all variables for which data were sought and any assumptions and simplifications made.                                                                                                                                                                                                     |                    |
| Critical appraisal of individual sources of evidence§ | 12   | If done, provide a rationale for conducting a critical appraisal of included sources of evidence; describe the methods used and how this information was used in any data synthesis (if appropriate).                                                                                                      |                    |
| Synthesis of results                                  | 13   | Describe the methods of handling and summarizing the data that were charted.                                                                                                                                                                                                                               |                    |

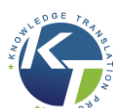

| SECTION                                       | ITEM | PRISMA-ScR CHECKLIST ITEM                                                                                                                                                                       | REPORTED ON PAGE # |
|-----------------------------------------------|------|-------------------------------------------------------------------------------------------------------------------------------------------------------------------------------------------------|--------------------|
| <b>RESULTS</b>                                |      |                                                                                                                                                                                                 |                    |
| Selection of sources of evidence              | 14   | Give numbers of sources of evidence screened, assessed for eligibility, and included in the review, with reasons for exclusions at each stage, ideally using a flow diagram.                    |                    |
| Characteristics of sources of evidence        | 15   | For each source of evidence, present characteristics for which data were charted and provide the citations.                                                                                     |                    |
| Critical appraisal within sources of evidence | 16   | If done, present data on critical appraisal of included sources of evidence (see item 12).                                                                                                      |                    |
| Results of individual sources of evidence     | 17   | For each included source of evidence, present the relevant data that were charted that relate to the review questions and objectives.                                                           |                    |
| Synthesis of results                          | 18   | Summarize and/or present the charting results as they relate to the review questions and objectives.                                                                                            |                    |
| <b>DISCUSSION</b>                             |      |                                                                                                                                                                                                 |                    |
| Summary of evidence                           | 19   | Summarize the main results (including an overview of concepts, themes, and types of evidence available), link to the review questions and objectives, and consider the relevance to key groups. |                    |
| Limitations                                   | 20   | Discuss the limitations of the scoping review process.                                                                                                                                          |                    |
| Conclusions                                   | 21   | Provide a general interpretation of the results with respect to the review questions and objectives, as well as potential implications and/or next steps.                                       |                    |
| <b>FUNDING</b>                                |      |                                                                                                                                                                                                 |                    |
| Funding                                       | 22   | Describe sources of funding for the included sources of evidence, as well as sources of funding for the scoping review. Describe the role of the funders of the scoping review.                 |                    |

JBI = Joanna Briggs Institute; PRISMA-ScR = Preferred Reporting Items for Systematic reviews and Meta-Analyses extension for Scoping Reviews.

\* Where *sources of evidence* (see second footnote) are compiled from, such as bibliographic databases, social media platforms, and Web sites.

† A more inclusive/heterogeneous term used to account for the different types of evidence or data sources (e.g., quantitative and/or qualitative research, expert opinion, and policy documents) that may be eligible in a scoping review as opposed to only studies. This is not to be confused with *information sources* (see first footnote).

‡ The frameworks by Arksey and O'Malley (6) and Levac and colleagues (7) and the JBI guidance (4, 5) refer to the process of data extraction in a scoping review as data charting.

§ The process of systematically examining research evidence to assess its validity, results, and relevance before using it to inform a decision. This term is used for items 12 and 19 instead of "risk of bias" (which is more applicable to systematic reviews of interventions) to include and acknowledge the various sources of evidence that may be used in a scoping review (e.g., quantitative and/or qualitative research, expert opinion, and policy document).

From: Tricco AC, Lillie E, Zarin W, O'Brien KK, Colquhoun H, Levac D, et al. PRISMA Extension for Scoping Reviews (PRISMA-ScR): Checklist and Explanation. *Ann Intern Med.* 2018;169:467–473. doi: 10.7326/M18-0850.

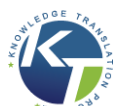

# BMJ Open

## Assessing the impact of screening, early identification, and intervention programs for Chronic Kidney Disease: Protocol for a scoping review.

|                                 |                                                                                                                                                                                                                                                                                                                                                                                                                                                                                                                                                                                                                                                                                                                                                                                                                                                                                                                                                                                                                                                                                                                                                                                                                                                                                                                                                                           |
|---------------------------------|---------------------------------------------------------------------------------------------------------------------------------------------------------------------------------------------------------------------------------------------------------------------------------------------------------------------------------------------------------------------------------------------------------------------------------------------------------------------------------------------------------------------------------------------------------------------------------------------------------------------------------------------------------------------------------------------------------------------------------------------------------------------------------------------------------------------------------------------------------------------------------------------------------------------------------------------------------------------------------------------------------------------------------------------------------------------------------------------------------------------------------------------------------------------------------------------------------------------------------------------------------------------------------------------------------------------------------------------------------------------------|
| Journal:                        | <i>BMJ Open</i>                                                                                                                                                                                                                                                                                                                                                                                                                                                                                                                                                                                                                                                                                                                                                                                                                                                                                                                                                                                                                                                                                                                                                                                                                                                                                                                                                           |
| Manuscript ID                   | bmjopen-2021-053857.R1                                                                                                                                                                                                                                                                                                                                                                                                                                                                                                                                                                                                                                                                                                                                                                                                                                                                                                                                                                                                                                                                                                                                                                                                                                                                                                                                                    |
| Article Type:                   | Protocol                                                                                                                                                                                                                                                                                                                                                                                                                                                                                                                                                                                                                                                                                                                                                                                                                                                                                                                                                                                                                                                                                                                                                                                                                                                                                                                                                                  |
| Date Submitted by the Author:   | 18-Oct-2021                                                                                                                                                                                                                                                                                                                                                                                                                                                                                                                                                                                                                                                                                                                                                                                                                                                                                                                                                                                                                                                                                                                                                                                                                                                                                                                                                               |
| Complete List of Authors:       | Okpechi, Ikechi G ; University of Cape Town Faculty of Health Sciences, Division of Nephrology and Hypertension; University of Alberta Faculty of Medicine & Dentistry<br>Caskey, Fergus; North Bristol NHS Trust, Richard Bright Renal Unit; UK Renal Registry<br>Gaipov, Abdzhappar; Nazarbaev universitet, Medicine<br>Tannor, Elliot; Komfo Anokye Teaching Hospital, Department of Medicine<br>Hamonik, Laura; University of Alberta, John W. Scott Health Sciences Library<br>Ashuntantang, Gloria; University of Yaounde I, Department of Internal Medicine and Subspecialties<br>Donner, Jo-Ann; International Society of Nephrology, Global Operations Centre<br>Figueiredo, Ana; Pontifícia Universidade Católica do Rio Grande do Sul<br>Inagi, Reiko; The University of Tokyo Graduate School of Medicine Faculty of Medicine<br>Madero, Magdalena; Instituto Nacional de Cardiología Ignacio Chávez<br>Malik, Charu; International Society of Nephrology, Global Operations Centre<br>Moorthy, Monica; International Society of Nephrology, Global Operations Centre<br>Pecoits-Filho, Roberto ; Arbor Research Collaborative for Health,<br>Tesar, Vladimir; Charles University, Department of Medicine<br>Levin, Adeera; The University of British Columbia Faculty of Medicine, Medicine<br>Jha, Vivekanand; The George Institute for Global Health India |
| <b>Primary Subject Heading</b>: | Renal medicine                                                                                                                                                                                                                                                                                                                                                                                                                                                                                                                                                                                                                                                                                                                                                                                                                                                                                                                                                                                                                                                                                                                                                                                                                                                                                                                                                            |
| Secondary Subject Heading:      | Epidemiology, Public health, Renal medicine                                                                                                                                                                                                                                                                                                                                                                                                                                                                                                                                                                                                                                                                                                                                                                                                                                                                                                                                                                                                                                                                                                                                                                                                                                                                                                                               |
| Keywords:                       | Chronic renal failure < NEPHROLOGY, End stage renal failure < NEPHROLOGY, Adult nephrology < NEPHROLOGY, EPIDEMIOLOGY                                                                                                                                                                                                                                                                                                                                                                                                                                                                                                                                                                                                                                                                                                                                                                                                                                                                                                                                                                                                                                                                                                                                                                                                                                                     |
|                                 |                                                                                                                                                                                                                                                                                                                                                                                                                                                                                                                                                                                                                                                                                                                                                                                                                                                                                                                                                                                                                                                                                                                                                                                                                                                                                                                                                                           |

1  
2  
3  
4  
5  
6  
7  
8  
9  
10  
11  
12  
13  
14  
15  
16  
17  
18  
19  
20  
21  
22  
23  
24  
25  
26  
27  
28  
29  
30  
31  
32  
33  
34  
35  
36  
37  
38  
39  
40  
41  
42  
43  
44  
45  
46  
47  
48  
49  
50  
51  
52  
53  
54  
55  
56  
57  
58  
59  
60

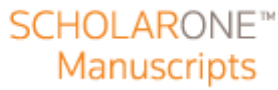



I, the Submitting Author has the right to grant and does grant on behalf of all authors of the Work (as defined in the below author licence), an exclusive licence and/or a non-exclusive licence for contributions from authors who are: i) UK Crown employees; ii) where BMJ has agreed a CC-BY licence shall apply, and/or iii) in accordance with the terms applicable for US Federal Government officers or employees acting as part of their official duties; on a worldwide, perpetual, irrevocable, royalty-free basis to BMJ Publishing Group Ltd ("BMJ") its licensees and where the relevant Journal is co-owned by BMJ to the co-owners of the Journal, to publish the Work in this journal and any other BMJ products and to exploit all rights, as set out in our [licence](#).

The Submitting Author accepts and understands that any supply made under these terms is made by BMJ to the Submitting Author unless you are acting as an employee on behalf of your employer or a postgraduate student of an affiliated institution which is paying any applicable article publishing charge ("APC") for Open Access articles. Where the Submitting Author wishes to make the Work available on an Open Access basis (and intends to pay the relevant APC), the terms of reuse of such Open Access shall be governed by a Creative Commons licence – details of these licences and which [Creative Commons](#) licence will apply to this Work are set out in our licence referred to above.

Other than as permitted in any relevant BMJ Author's Self Archiving Policies, I confirm this Work has not been accepted for publication elsewhere, is not being considered for publication elsewhere and does not duplicate material already published. I confirm all authors consent to publication of this Work and authorise the granting of this licence.



**Title:** Assessing the impact of screening, early identification, and intervention programs for Chronic Kidney Disease: Protocol for a scoping review.

**Authors:** Ikechi G. Okpechi;<sup>1,2,3</sup> Fergus J. Caskey;<sup>4</sup> Abduzhappar Gaipov;<sup>5</sup> Elliot K. Tannor;<sup>6,7</sup> Laura N. Hamonic;<sup>8</sup> Gloria Ashuntantang;<sup>9</sup> Jo-Ann Donner;<sup>10</sup> Ana Figueiredo;<sup>11</sup> Reiko Inagi;<sup>12</sup> Magdalena Madero;<sup>13</sup> Charu Malik;<sup>10</sup> Monica Moorthy;<sup>10</sup> Roberto Pecoits-Filho;<sup>14</sup> Vladimir Tesar;<sup>15</sup> Adeera Levin;<sup>16</sup> Vivekanand Jha.<sup>17,18,19</sup>

**Affiliations:**

- 1 – Department of Medicine, University of Alberta, Edmonton, Canada
- 2 – Division of Nephrology and Hypertension, University of Cape Town, Cape Town, South Africa
- 3 – Kidney and Hypertension Research unit, University of Cape Town, Cape Town, South Africa
- 4 – Department of Medicine, Population Health Sciences, Bristol Medical School, University of Bristol, Bristol, UK
- 5 – Department of Medicine, Nazarbayev University School of Medicine, Nur-Sultan, Kazakhstan
- 6 – Renal Unit, Department of Medicine, Komfo Anokye Teaching Hospital, Kumasi, Ghana.
- 7 – Department of Medicine, Kwame Nkrumah University of Science and Technology, Kumasi, Ghana
- 8 – John W. Scott Health Sciences Library, University of Alberta, Edmonton, Alberta, Canada
- 9 – Department of Internal Medicine and Specialties, Faculty of Medicine and Biomedical Sciences, University of Yaoundé 1, Yaoundé, Cameroon
- 10 – Global Operations Centre, International Society of Nephrology, Brussels, Belgium.
- 11- School of Health Science – Nursing School, Pontifícia Universidade Católica do Rio Grande do Sul (PUCRS), Porto Alegre, Brazil.
- 12 – Division of Chronic Kidney Disease Pathophysiology, The University of Tokyo Graduate School of Medicine, 7-3-1 Hongo, Bunkyo-ku, Tokyo, 113-8655, Japan.
- 13 – Department of Medicine, Division of Nephrology, Instituto Nacional de Cardiología Ignacio Chávez, Mexico City, Mexico.
- 14 – Department of Medicine, School of Medicine, Pontifícia Universidade Católica do Paraná (PUCPR), Curitiba, Brazil.
- 15 – Department of Nephrology, 1st Faculty of Medicine, General University Hospital, Charles University, Prague, Czechia.
- 16 – Division of Nephrology, University of British Columbia, Vancouver, British Columbia, Canada.
- 17 – George Institute for Global Health, UNSW, New Delhi, India.
- 18 – Department of Medicine, School of Public Health, Imperial College, London, United Kingdom.
- 19 – Department of Medicine, Manipal Academy of Higher Education, Manipal, India.

1  
2  
3 **Corresponding author:**  
4

5 **Name:** Ikechi G. Okpechi  
6

7 **Address:** Division of Nephrology, University of Cape Town, South Africa  
8

9 **Email:** [ikechi.Okpechi@uct.ac.za](mailto:ikechi.Okpechi@uct.ac.za)  
10

11 **Abstract word count: (265)**  
12

13 **Manuscript word count: (2,890)**  
14

15 **Running Title:** CKD screening and early identification programs  
16

17 **Keywords:** chronic kidney disease, early identification, implementation, interventions,  
18 screening,  
19  
20  
21  
22  
23  
24  
25  
26  
27  
28  
29  
30  
31  
32  
33  
34  
35  
36  
37  
38  
39  
40  
41  
42  
43  
44  
45  
46  
47  
48  
49  
50  
51  
52  
53  
54  
55  
56  
57  
58  
59  
60

**Abstract:*****Introduction***

Chronic kidney disease (CKD) is a major threat to public health, especially in low-income and lower-middle-income countries where resources for treating patients with advanced CKD are scarce. Although early CKD identification and intervention holds promise for reducing the burden of CKD and risk factors, it remains unclear if a uniform strategy can be applicable across all income groups. The aim of this scoping review is to synthesize available evidence on early CKD identification programs in all world regions and income groups. The study will also identify efforts that have been made to utilize interventions and implementation of early identification programs for CKD across countries and income groups.

***Methods and analysis***

This review will be guided by the methodological framework for conducting scoping studies developed by Arksey and O'Malley. Empirical (Medline, Embase, Cochrane Library, CINAHL, ISI Web of Science and PsycINFO) and grey literature references will be searched to identify studies on CKD screening, early identification, and interventions across all populations. Two reviewers will independently screen references in consecutive stages of title/abstract screening and then full-text screening. We will utilize a general descriptive overview, tabular summaries, and content analysis on extracted data.

***Ethics and dissemination***

The findings from our planned scoping review will enable us to identify items in early identification programs that can be used in developing screening toolkits for CKD. We will disseminate our findings using traditional approaches that includes open-access peer-reviewed publication, scientific presentations, and a white paper (call to action) report. Ethical approval will not be required for this scoping review as the data will be extracted from already published studies.

**Strengths and limitations of this protocol:**

- This study will provide a comprehensive overview (where, when, why, how, and who) of studies on early detection of chronic kidney disease (CKD).
- This study will identify proportion of studies that utilized interventions following CKD early identification as well as the types of interventions commonly used.
- This study will also provide information on where early identification programs have become integrated or implemented in health policies and practices.
- This study will also identify international variations and components of early identification programs to be used for developing CKD screening toolkits for countries in different income groups.
- We foresee that a potential limitation of this study could include our inability to access policy documents related to implementation of screening and early detection programs, particularly in low-income and lower-middle income countries.

## Introduction

Worldwide, the burden of chronic kidney disease (CKD) continues to rise. This is evidenced by its climb in ranking of global causes of death from 17<sup>th</sup> in 1990 to 12<sup>th</sup> in 2017 when the global prevalence of CKD was 697.5 million with an estimated 1.2 million deaths.<sup>1</sup> More recently, the World Health Organization (WHO) ranked CKD as the 10<sup>th</sup> commonest cause of death.<sup>2</sup> It is currently the 3<sup>rd</sup> fastest growing cause of death and, according to projections, will become the 5<sup>th</sup> commonest cause of years of life lost (YLL), rising from 16<sup>th</sup> in 2016.<sup>3</sup> Even more alarmingly, although increase in CKD is occurring globally, most of this growth is projected to be in low-income and lower-middle-income countries (LLMICs) and amongst disadvantaged and indigenous communities in high income countries (HICs) where access to care is significantly limited.<sup>1, 4</sup>

Although cost,<sup>4-6</sup> workforce,<sup>7</sup> leadership,<sup>8, 9</sup> and organization of care<sup>10</sup> represent major barriers to accessing kidney care in LLMICs, the impact of cost of care and excessive out-of-pocket payment systems affect the people directly and are more devastating. While governments pay for dialysis in HICs, patients in LLMICs often have to partly or fully cover the cost of treatment out-of-pocket. One study has estimated that the annual cost of providing hemodialysis (HD) in Kenya, Nigeria and Senegal to be (International dollar) Int\$1.7 billion, Int\$3.5 billion, and Int\$450 million respectively, equivalent to 15.2%, 55.8% and 35.8% of the total domestic government health expenditure of those countries.<sup>6</sup> The annual cost of HD in Nepal is about USD\$2,500, far higher than the minimum wage.<sup>11</sup> Moreover, CKD, even in early stages, massively increases the risk of development of cardiovascular disease (CVD).<sup>12</sup> <sup>13</sup> In addition, other modalities of kidney replacement therapies (KRT – i.e. peritoneal dialysis [PD] and kidney transplantation [KT]) are unavailable in many LLMICs. Compared

1  
2  
3 to HICs, PD and KT availability was very low in low-income countries: 0.9 per million  
4 population [pmp] versus 53.0 pmp<sup>14</sup> and 23% countries versus 89% countries, respectively.<sup>4</sup>  
5  
6  
7  
8  
9

10 The massive cost of KRT suggests the need to prioritize preventive strategies to delay  
11 kidney failure, rather than expand dialysis services.<sup>6</sup> This requires implementation of efficient  
12 and cost-effective screening and early detection and treatment programs to delay progression  
13 of kidney disease.<sup>15-17</sup> A few studies have shown that this is indeed possible. Out of 20,811  
14 individuals screened for CKD in Nepal<sup>18</sup>, 4471 were found to have hypertension, diabetes,  
15 proteinuria, or impaired kidney function. After 3 years of treatment with low-cost anti-  
16 hypertensive medications, anti-diabetic medications or ACE-inhibitors, 63 % of dipstick  
17 positive proteinuria had decreased to normal and 48 % of those with mildly to moderately  
18 impaired kidney function at baseline had stabilized or improved, highlighting the impact of  
19 early disease detection for reducing or halting CKD progression and cardiovascular morbidity  
20 and mortality in such settings.<sup>18</sup>  
21  
22  
23  
24  
25  
26  
27  
28  
29  
30  
31  
32  
33  
34  
35  
36  
37

38 Screening and early identification programs are also used in HICs to assess disease  
39 burden and institute measures to improve kidney health, prevent dialysis and improve  
40 cardiovascular outcomes.<sup>19-22</sup> However, these measures have sometimes been criticized as  
41 ineffective as they show no overall benefits<sup>23</sup> or are not cost-effective.<sup>24, 25</sup>  
42  
43  
44  
45  
46  
47  
48

49 The concept of prevention being better than cure is not new – but preventive measures  
50 are more effective if directed at those identified to be in danger of harm. Intuitively,  
51 screening, and early CKD detection, should lead to better outcomes as patients and their care  
52 givers are able to apply measures to retard progression and improve outcomes; however, this  
53 has not always been the case, and has prompted the age-old nephrology debate “To Screen or  
54  
55  
56  
57  
58  
59  
60

1  
2  
3 not to Screen?"<sup>25-27</sup> In many instances, attempts to determine CKD prevalence, increase  
4 awareness, and determine cardiovascular risk through screening or early detection programs,  
5 have not been coupled with follow-up actions.<sup>28</sup> The futility and possible harms of screening  
6 for CKD without availability of treatment have been pointed out.<sup>29</sup> Other programs have  
7 included interventions, e.g. referral to nephrology<sup>30-32</sup> or commencing specific therapies<sup>33, 34</sup>  
8 when CKD or risk factors were detected. Despite these, various questions persist regarding  
9 the usefulness and methodology of CKD screening programs (Table 1).<sup>15, 26, 29, 35, 36</sup> As these  
10 questions linger, there remains limited evidence to guide choices and decisions about  
11 screening which continues to be based on available local and regional resources as well as the  
12 cultural acceptability of modality of screening. An initial approach with risk scores and  
13 questionnaires to identify high-risk individuals appears to be potentially useful for large-scale  
14 screening. However, available models for risk prediction and CKD progression are largely  
15 based on European or North American populations and often require measuring biomarkers.  
16 This is a major inconvenience in many LLMICs where laboratory testing is not readily  
17 available.<sup>15</sup>

18  
19  
20  
21  
22  
23  
24  
25  
26  
27  
28  
29  
30  
31  
32  
33  
34  
35  
36  
37  
38  
39  
40 These persistent questions led to a controversies conference on "early identification  
41 and interventions in CKD" organized by Kidney Disease Improving Global Outcomes  
42 (KDIGO) after which a consensus emerged that CKD screening coupled with risk  
43 stratification and treatment should be implemented in primary or community care settings for  
44 high-risk persons.<sup>37</sup> Major nephrology groups and regional bodies of nephrology have also  
45 developed guidelines for CKD screening tailored to their population with differences arising  
46 around who to test (general public *versus* those at risk), recommended tests to use (urine  
47 protein *versus* serum creatinine *versus* cystatin C assays) and frequency of testing (once  
48 annually *versus* more than once annually).<sup>38-40</sup> As most of the recommendations are largely  
49  
50  
51  
52  
53  
54  
55  
56  
57  
58  
59  
60

1  
2  
3 based on evidence from observational studies (there are no randomized controlled studies  
4 assessing the benefits or harms of screening), selective approaches have been used in making  
5 recommendations for screening in different income groups and populations, including CKD  
6 hotspots.<sup>29</sup>  
7  
8  
9  
10  
11  
12  
13  
14

15 Due to the weak and observational nature of the evidence base, guidelines that have  
16 made recommendations have tended not to be readily accepted, based on the degree of  
17 uncertainty and the magnitude of impact of kidney disease on public health. In 2012, the  
18 report of a systematic review on CKD screening and monitoring conducted for the United  
19 States Preventive Services Task Force (USPSTF) and the American College of Physicians  
20 (ACP) did not recommend CKD screening in asymptomatic adults without risk factors as no  
21 direct evidence was found that such screening improved outcomes.<sup>23</sup> The American Society  
22 of Nephrology (ASN) countered this with a strong recommendation to continue regular  
23 screening for kidney disease, regardless of an individual's risk factors.<sup>41</sup>  
24  
25  
26  
27  
28  
29  
30  
31  
32  
33  
34  
35  
36  
37

38 Lack of awareness of CKD is still perceived as a significant challenge to tackling the  
39 public health problems of CKD, particularly in LLMIC where most individuals with CKD  
40 remain undetected until they have progressed to kidney failure.<sup>42</sup> Population-wide studies in  
41 high-risk individuals have reported high prevalence and low awareness of CKD.<sup>43-45</sup> In  
42 Mexico, of 1,519 participants of a CKD screening program, only 1% of those with CKD were  
43 aware, despite 71% having visited a physician in the preceding year.<sup>44</sup> However, recent data  
44 from participants with CKD in the REasons for Geographic And Racial Differences in Stroke  
45 (REGARDS) study, a national, longitudinal, population-based cohort did not show an  
46 association between awareness of CKD with odds of subsequent changes in health behaviors,  
47 CKD management indicators, or changes in eGFR and urine albumin-creatinine ratio  
48  
49  
50  
51  
52  
53  
54  
55  
56  
57  
58  
59  
60



1  
2  
3 (UACR).<sup>46</sup> The study concluded that clinician education needs to be coupled with  
4  
5 interventions to increase popular awareness of CKD for optimal impact on health behaviors  
6  
7 and chronic disease management indicators.  
8  
9

10  
11  
12 As these controversies continue and given the large body of literature on screening,  
13  
14 early identification programs, and interventions in CKD, we have designed a scoping review  
15  
16 to identify, describe and assess CKD early identification / screening / awareness programs  
17  
18 worldwide. Our aim is to synthesize available evidence on early CKD identification programs  
19  
20 in all world regions and income groups and to use the strengths and weaknesses of such  
21  
22 programs into developing a toolkit that can be used by nephrologists across all income groups  
23  
24 for early identification and intervention programs in CKD.  
25  
26  
27  
28  
29

## 30 **Methods and Analysis**

### 31 *Approach*

32  
33 We will be guided by the methodological framework for conducting scoping studies  
34  
35 developed by Arksey and O'Malley in 2005.<sup>47</sup> This framework has been further enhanced by  
36  
37 work done by others including the JBI International Committee.<sup>48-51</sup> The framework includes  
38  
39 five steps (with an optional sixth step): (1) identifying the research question; (2) identifying  
40  
41 the relevant studies; (3) study selection; (4) charting the data and (5) reporting the results; (6)  
42  
43 consultation (optional). We will also utilize best practices for conducting and reporting  
44  
45 systematic reviews (i.e., Preferred Reporting Items for Systematic Reviews and Meta-  
46  
47 Analyses (PRISMA) for Protocols and Scoping Reviews (PRISMA-ScR) for reporting our  
48  
49 findings.<sup>52, 53</sup>  
50  
51  
52  
53  
54  
55  
56  
57

### 58 **Stage 1. Identifying the research question**

We utilized a comprehensive approach that included screening methods, target population, and interventions utilized in framing our research question: “*What attempts have been made to establish CKD early detection / screening / awareness programs?*”. Using key themes in the conclusions from KDIGO<sup>37</sup> and to be able to fully answer the main study question, other questions will need to be addressed, including:

1. *What populations have been screened for CKD and what risk stratification has been included in screening?*
2. *What measurements methods have been used to screen for CKD?*
3. *What secondary preventive interventions have been utilized in those identified with CKD?*
4. *What efforts have been made to implement or integrate CKD screening programs into health system?*

We believe that answering these questions will enable us to identify all potential components required to launch and sustain a CKD screening or early detection program.

## **Stage 2. Identifying the relevant studies**

Development of the search strategy will aim at getting a comprehensive review of the existing evidence base. We will identify studies through a detailed search (from inception) of the following bibliographic databases: Medline (Ovid), Embase (Ovid), Cochrane Library, CINAHL, ISI Web of Science and PsycINFO. We will also search grey literature (including ProQuest Dissertations & Theses Global, and Conference Proceedings Citation Index [Clarivate Analytics]) using recommended resources in consultation with our medical librarian (LH). However, we will specifically hand-search for information (e.g., policy documents or position papers) on guidelines for CKD early identification / screening for countries and regions that will be represented in our study. We have developed the search

1  
2  
3 strategy to be used in Medline (Table 2) and will adapt this strategy for other databases. The  
4  
5 search strategy includes subject headings, related terms and key words necessary for the  
6  
7 research question. We will use Boolean logic and operators (ie, 'AND', 'OR', 'NOT') to  
8  
9 combine and refine search terms. Given the complexities associated with implementing CKD  
10  
11 early identification programs, and that post-program implementation policies may not have  
12  
13 been included in primary publications, we will search for secondary publications and  
14  
15 documents and where necessary contact authors of selected studies to ascertain if such  
16  
17 programs became health policy.  
18  
19  
20  
21  
22  
23

### 24 **Stage 3. Study selection**

25  
26 We will include studies that report the results of CKD screening. We will group the  
27  
28 studies based on the World Bank country income groups and type of screening. Two  
29  
30 reviewers (EKT and AG) will independently screen all identified citations for potential  
31  
32 inclusion. When agreement on a citation cannot be reached between the two reviewers, a  
33  
34 third reviewer (MM) will be consulted for reconciliation. The review process will first  
35  
36 involve screening of the titles and abstracts and then a detailed review of all selected full texts  
37  
38 to ascertain eligibility for inclusion (Figure 1). An article will be included if it meets the  
39  
40 following criteria:  
41  
42  
43  
44  
45  
46

- 47 • **Population:** Studies that provided results of CKD screening (with or without an  
48  
49 intervention) carried out in any adult ( $\geq 18$  years) population. For studies in the same  
50  
51 population with multiple years of publications, the result of the latest study will be  
52  
53 used, and studies conducted across multiple countries will be reported as  
54  
55 "multinational" with the list of participating countries provided.  
56  
57  
58  
59  
60

- **Intervention:** CKD screening, or CKD early detection programs, or CKD awareness programs.
- **Comparator:** Standard of care (if applicable)
- **Outcomes:** CKD early identification programs / studies reporting at least one of the following: CKD detection rate (with or without risk factor detection rate), methods utilized for screening, people who carried out the screening, interventions utilized (e.g., proportion referred to nephrology clinics, proportion that started treatment, etc), cost-effectiveness of the program, and CKD screening policies implemented.
- **Study design:** all screening study designs that reported at least one of the outcomes.
- **Limits:** All databases will be searched from inception with no language restrictions.

The following studies will be excluded:

- Screening studies in children
- Screening studies for acute kidney injury (AKI), urological diseases (e.g., prostate cancer awareness programs), or CKD risk factors (e.g., hypertension and diabetes), if no attempt was made to specifically screen for CKD.
- Organ donor screening or awareness programs
- Review articles, editorials, commentaries, letters to the editor, and guidelines and recommendations on CKD screening.

#### Stage 4. Data Extraction

Results of the search will be collated in a Microsoft Excel spreadsheet. We will follow recommended data charting methods<sup>47</sup> to capture relevant details for included studies (Table 3). The data items collected will follow 4 themes: (i) population screened and screening methods used (e.g., duration of screening, country of study, type of program:

1  
2  
3 “national” or “other”, screening type: mass (community-based) / targeted (within a known  
4  
5 CKD risk factor cohort), workforce involved in screening, repeat evaluation, motivation for  
6  
7 the program (e.g., World Kidney Day program, public health concerns for rising kidney  
8  
9 disease, etc.). We will also extract data on race / ethnicity of the population screened.  
10  
11  
12 Although, race is not often well defined in numerous studies, we will capture data using the  
13  
14 following races (if reported): Arabs / Middle Easterners, Asians, Black Africans / African  
15  
16 Americans, Caucasians, Hispanics, Indigenous groups, Latin Americans, others, (ii)  
17  
18 measurements utilized for assessing CKD (e.g. urine dipsticks, serum creatinine, eGFR, etc.),  
19  
20 (iii) interventions utilized in those identified with CKD (e.g. referral to nephrology or  
21  
22 specialist care, initiation of specific treatment (lifestyle measures, ACE-inhibitors, attempts to  
23  
24 follow up patients offered interventions, etc.), and (iv) health systems and economic factors  
25  
26 associated with screening (e.g. implementation programs, cost-effectiveness, etc.). All  
27  
28 extracted data will be reviewed for accuracy and completeness.  
29  
30  
31  
32  
33  
34

### 35 **Stage 5. Collating, summarizing, and reporting of the results**

36  
37 We will follow recommendations to extend the scoping review process by adding  
38  
39 thematic analysis.<sup>48</sup> Hence, extracted data will be analysed qualitatively using both deductive  
40  
41 (pre-identified themes) and inductive (new identified themes) approaches. Primary analysis  
42  
43 of data will be based on four themes identified by KDIGO:<sup>37</sup> (i) population screened, (ii)  
44  
45 diagnostic characteristics of tests for kidney disease utilized, (iii) treatments (interventions)  
46  
47 utilized to reduce the risk of CKD progression and cardiovascular disease, and (iv)  
48  
49 implementation strategies for early CKD identification programs. These approaches will  
50  
51 enable us to answer the broad research question and allow us to expand our response with  
52  
53 new findings that were not previously included. Although specific data (e.g., CKD detection  
54  
55 rate) will be collected, such data will not be pooled for further analysis. Textual data from  
56  
57  
58  
59  
60

1  
2  
3 included papers will be coded individually using simple “yes” or “no” responses and other  
4  
5 broad-based coding scheme by (EKT) and (AG) to look for common themes across papers.  
6  
7  
8 We will present overall results using percentages of “yes” responses.  
9  
10  
11

## 12 **Stage 6. Consultation exercise**

13  
14 Consultation is an optional part of conducting a scoping review, however, where  
15  
16 necessary, we will contact primary authors, regional nephrology leaders or Departments /  
17  
18 Ministries of Health for policy documents on implementation of CKD screening programs.  
19  
20 Consultation will be necessary after selecting studies to be included and only if we are unable  
21  
22 to identify online policy documents on early CKD identification for countries represented in  
23  
24 selected studies. This process will be facilitated by members of the ISN Regional Board  
25  
26 (<https://www.theisn.org/about-isn/governance/regional-boards/>) for countries represented in  
27  
28  
29  
30  
31 selected studies.  
32  
33  
34

## 35 **Patient and public involvement**

36  
37 Patients and the public will not be involved in this scoping review; however, the ISN  
38  
39 is seeking to establish a globally representative patient advisory group. It would be  
40  
41 appropriate for such a group to make input into subsequent, more specific research questions  
42  
43 that are generated from studies identified in this scoping review.  
44  
45  
46  
47  
48

## 49 **Discussion, Ethics, and dissemination**

50  
51 The findings from our planned scoping review will enable us to identify items in  
52  
53 screening and early identification programs that can be used in developing screening toolkits  
54  
55 for CKD. The results will also enable us to understand what is feasible and the capacity of  
56  
57 countries in different income groups for conducting and sustaining screening programs.  
58  
59  
60

1  
2  
3 Various reviews and recommendations have suggested using different screening approaches  
4 in LLMICs given the lack of capacity to integrate identified CKD cases into the broader  
5 health system and the general lack of capacity to measure the quality of care in existing CKD  
6 cases.<sup>29, 37</sup> Thus, based on our results, this scoping review will be able to suggest components  
7 for consideration for inclusion in screening toolkits for countries in different income groups,  
8 though these are likely to need testing for effectiveness. Furthermore, we anticipate that this  
9 scoping review will likely lead to more specific questions (e.g., how sensitive and specific are  
10 urine dipsticks findings for screening?) that require detailed interrogation through systematic  
11 reviews or randomized controlled study designs. A potential limitation of this scoping review  
12 could be our inability to access policy documents backing the implementation / integration  
13 strategies of early identification programs to health systems, particularly in LLMICs. We  
14 hope that by contacting nephrology leaders and experts in those regions, we will be able to  
15 obtain information on the availability of such policy documents. Finally, ethical approval will  
16 not be needed for this study as data used will be extracted from already published studies.  
17 Our dissemination strategy will use traditional approaches, including open-access peer-  
18 reviewed publication(s), scientific presentations, and a report.  
19  
20  
21  
22  
23  
24  
25  
26  
27  
28  
29  
30  
31  
32  
33  
34  
35  
36  
37  
38  
39  
40  
41  
42  
43  
44  
45  
46  
47  
48  
49  
50  
51  
52  
53  
54  
55  
56  
57  
58  
59  
60

**Author contributions:**

VJ, AL, IGO, and FJC conceived the study design. The first version of the protocol was drafted by IGO and was revised by FJC, AG, EKT, LNH, GA, JD, AF, RI, MM, CM, MM, RP-F, VT, AL, and VJ. The search strategy was developed and performed by LNH. AG and EKT will perform the screening, study selection and collect data from all included studies and MM will adjudicate any conflicts in study selection. All authors revised and critically reviewed this manuscript and approved the final version.

**Funding:**

This is an International Society of Nephrology (ISN) initiative supported by an unrestricted educational grant from AstraZeneca (No grant number).

**Competing interests:**

RP-F reports grants from Fresenius Medical Care, provides scientific leadership to George Clinical, and consultancy fees for Astra Zeneca, B-I, Bayer, Akebia, Novo Nordisk, all paid to his institution, outside the submitted work. VT reports consultancy fee from Boehringer-Ingelheim, Calliditas, Fresenius Medical Care, Novartis and Traverso. VJ reports grants from GlaxoSmithKline and Baxter Healthcare, provides scientific leadership to George Clinical, and consultancy fees for Biocon, Zudis Cadilla, and NephroPlus, all paid to his institution, outside the submitted work.

**Patient consent:**

Not required.

**Data sharing statement:**

We will make data available on request



## References

1. GBD Chronic Kidney Disease Collaboration. Global, regional, and national burden of chronic kidney disease, 1990-2017: a systematic analysis for the Global Burden of Disease Study 2017. *Lancet (London, England)*. Feb 29 2020;395(10225):709-733. doi:10.1016/s0140-6736(20)30045-3
2. World Health Organization. The top 10 causes of death. Accessed 19 March 2021, <https://www.who.int/news-room/fact-sheets/detail/the-top-10-causes-of-death>
3. Foreman KJ, Marquez N, Dolgert A, et al. Forecasting life expectancy, years of life lost, and all-cause and cause-specific mortality for 250 causes of death: reference and alternative scenarios for 2016-40 for 195 countries and territories. *Lancet (London, England)*. Nov 10 2018;392(10159):2052-2090. doi:10.1016/s0140-6736(18)31694-5
4. Bello AK, Levin A, Lunney M, et al. Status of care for end stage kidney disease in countries and regions worldwide: international cross sectional survey. *Bmj*. Oct 31 2019;367:l5873. doi:10.1136/bmj.l5873
5. Tang SCW, Yu X, Chen HC, et al. Dialysis Care and Dialysis Funding in Asia. *American journal of kidney diseases : the official journal of the National Kidney Foundation*. May 2020;75(5):772-781. doi:10.1053/j.ajkd.2019.08.005
6. Crosby L, Baker P, Hangoma P, Barasa E, Hamidi V, Chalkidou K. Dialysis in Africa: the need for evidence-informed decision making. *The Lancet Global health*. Apr 2020;8(4):e476-e477. doi:10.1016/s2214-109x(20)30058-9
7. Riaz P, Caskey F, McIsaac M, et al. Workforce capacity for the care of patients with kidney failure across world countries and regions. *BMJ Glob Health*. Jan 2021;6(1)doi:10.1136/bmjgh-2020-004014
8. Bello AK, Alrukhaimi M, Ashuntantang GE, et al. Global overview of health systems oversight and financing for kidney care. *Kidney Int Suppl (2011)*. Feb 2018;8(2):41-51. doi:10.1016/j.kisu.2017.10.008
9. Lunney M, Alrukhaimi M, Ashuntantang GE, et al. Guidelines, policies, and barriers to kidney care: findings from a global survey. *Kidney Int Suppl (2011)*. Feb 2018;8(2):30-40. doi:10.1016/j.kisu.2017.10.007
10. Htay H, Alrukhaimi M, Ashuntantang GE, et al. Global access of patients with kidney disease to health technologies and medications: findings from the Global Kidney Health Atlas project. *Kidney International Supplements*. 2018;8(2):64-73. doi:10.1016/j.kisu.2017.10.010
11. Divyaveer SS, Ramachandran R, Sahay M, et al. International Society of Nephrology Global Kidney Health Atlas: structures, organization, and services for the management of kidney failure in South Asia. *Kidney International Supplements*. 2021;11(2):e97-e105.
12. Jankowski J, Floege J, Fliser D, Böhm M, Marx N. Cardiovascular Disease in Chronic Kidney Disease: Pathophysiological Insights and Therapeutic Options. *Circulation*. Mar 16 2021;143(11):1157-1172. doi:10.1161/circulationaha.120.050686
13. Gansevoort RT, Correa-Rotter R, Hemmelgarn BR, et al. Chronic kidney disease and cardiovascular risk: epidemiology, mechanisms, and prevention. *Lancet (London, England)*. Jul 27 2013;382(9889):339-52. doi:10.1016/s0140-6736(13)60595-4
14. Cho Y, Bello AK, Levin A, et al. Peritoneal Dialysis Use and Practice Patterns: An International Survey Study. *American journal of kidney diseases : the official journal of the National Kidney Foundation*. Mar 2021;77(3):315-325. doi:10.1053/j.ajkd.2020.05.032
15. George C, Mogueo A, Okpechi I, Echouffo-Tcheugui JB, Kengne AP. Chronic kidney disease in low-income to middle-income countries: the case for increased screening. *BMJ Glob Health*. 2017;2(2):e000256. doi:10.1136/bmjgh-2016-000256
16. Perico N, Plata R, Anabaya A, et al. Strategies for national health care systems in emerging countries: the case of screening and prevention of renal disease progression in

- 1  
2  
3 Bolivia. *Kidney international Supplement*. Aug 2005;(97):S87-94. doi:10.1111/j.1523-  
4 1755.2005.09715.x
- 5 17. Perico N, Remuzzi G. Prevention programs for chronic kidney disease in low-income  
6 countries. *Intern Emerg Med*. Apr 2016;11(3):385-9. doi:10.1007/s11739-016-1425-7
- 7 18. Sharma SK, Ghimire A, Carminati S, Remuzzi G, Perico N. Management of chronic  
8 kidney disease and its risk factors in eastern Nepal. *The Lancet Global health*. Sep  
9 2014;2(9):e506-e507. doi:10.1016/s2214-109x(14)70281-5
- 10 19. Gansevoort RT, Verhave JC, Hillege HL, et al. The validity of screening based on  
11 spot morning urine samples to detect subjects with microalbuminuria in the general  
12 population. *Kidney international Supplement*. Apr 2005;(94):S28-35. doi:10.1111/j.1523-  
13 1755.2005.09408.x
- 14 20. Coresh J, Astor BC, Greene T, Eknoyan G, Levey AS. Prevalence of chronic kidney  
15 disease and decreased kidney function in the adult US population: Third National Health and  
16 Nutrition Examination Survey. *American journal of kidney diseases : the official journal of  
17 the National Kidney Foundation*. Jan 2003;41(1):1-12. doi:10.1053/ajkd.2003.50007
- 18 21. Komenda P, Lavalley B, Ferguson TW, et al. The prevalence of CKD in rural  
19 Canadian indigenous peoples: results from the First Nations Community Based Screening to  
20 Improve Kidney Health and Prevent Dialysis (FINISHED) screen, triage, and treat program.  
21 *American journal of kidney diseases : the official journal of the National Kidney Foundation*.  
22 2016;68(4):582-590.
- 23 22. Takahashi S, Okada K, Yanai M. The Kidney Early Evaluation Program (KEEP) of  
24 Japan: results from the initial screening period. *Kidney international Supplement*. Mar  
25 2010;(116):S17-23. doi:10.1038/ki.2009.539
- 26 23. Fink HA, Ishani A, Taylor BC, et al. Screening for, monitoring, and treatment of  
27 chronic kidney disease stages 1 to 3: a systematic review for the U.S. Preventive Services  
28 Task Force and for an American College of Physicians Clinical Practice Guideline. *Annals of  
29 internal medicine*. Apr 17 2012;156(8):570-81. doi:10.7326/0003-4819-156-8-201204170-  
30 00004
- 31 24. Manns B, Hemmelgarn B, Tonelli M, et al. Population based screening for chronic  
32 kidney disease: cost effectiveness study. *Bmj*. Nov 8 2010;341:c5869. doi:10.1136/bmj.c5869
- 33 25. Qaseem A, Wilt TJ, Cooke M, Denberg TD. The paucity of evidence supporting  
34 screening for stages 1-3 CKD in asymptomatic patients with or without risk factors. *Clinical  
35 journal of the American Society of Nephrology : CJASN*. Nov 7 2014;9(11):1993-5.  
36 doi:10.2215/cjn.02940314
- 37 26. Klinger AS. Screening for CKD: a pro and con debate. *Clinical journal of the  
38 American Society of Nephrology : CJASN*. Nov 7 2014;9(11):1987.  
39 doi:10.2215/cjn.08990914
- 40 27. Berns JS. Routine screening for CKD should be done in asymptomatic adults...  
41 selectively. *Clinical journal of the American Society of Nephrology : CJASN*. Nov 7  
42 2014;9(11):1988-92. doi:10.2215/cjn.02250314
- 43 28. Cepoi V, Onofriescu M, Segall L, Covic A. The prevalence of chronic kidney disease  
44 in the general population in Romania: a study on 60,000 persons. *Int Urol Nephrol*. Feb  
45 2012;44(1):213-20. doi:10.1007/s11255-011-9923-z
- 46 29. Tonelli M, Dickinson JA. Early Detection of CKD: Implications for Low-Income,  
47 Middle-Income, and High-Income Countries. *Journal of the American Society of Nephrology  
48 : JASN*. Sep 2020;31(9):1931-1940. doi:10.1681/asn.2020030277
- 49 30. Garcia-Garcia G, Marquez-Magaña I, Renoirte-Lopez K, et al. Screening for kidney  
50 disease on World Kidney Day in Jalisco, Mexico. *J Nephrol*. Mar-Apr 2010;23(2):224-30.  
51  
52  
53  
54  
55  
56  
57  
58  
59  
60

- 1  
2  
3 31. Galbraith LE, Ronksley PE, Barnieh LJ, et al. The See Kidney Disease Targeted  
4 Screening Program for CKD. *Clinical journal of the American Society of Nephrology* :  
5 *CJASN*. Jun 6 2016;11(6):964-72. doi:10.2215/cjn.11961115
- 6 32. Gayoso-Diz P, Otero-González A, Rodríguez-Álvarez MX, García F, González-  
7 Quintela A, Martín de Francisco AL. Strategy to estimate risk progression of chronic kidney  
8 disease, cardiovascular risk, and referral to nephrology: the EPIRCE Study. *Nefrologia* :  
9 *publicacion oficial de la Sociedad Espanola Nefrologia*. 2013;33(2):223-30.  
10 doi:10.3265/Nefrologia.pre2013.Jan.11792
- 11 33. Sharma SK, Zou H, Togtokh A, et al. Burden of CKD, proteinuria, and cardiovascular  
12 risk among Chinese, Mongolian, and Nepalese participants in the International Society of  
13 Nephrology screening programs. *American journal of kidney diseases : the official journal of*  
14 *the National Kidney Foundation*. Nov 2010;56(5):915-27. doi:10.1053/j.ajkd.2010.06.022
- 15 34. Diercks GF, Janssen WM, van Boven AJ, et al. Rationale, design, and baseline  
16 characteristics of a trial of prevention of cardiovascular and renal disease with fosinopril and  
17 pravastatin in nonhypertensive, nonhypercholesterolemic subjects with microalbuminuria (the  
18 Prevention of RENal and Vascular ENdstage Disease Intervention Trial [PREVEND IT]). *Am*  
19 *J Cardiol*. Sep 15 2000;86(6):635-8. doi:10.1016/s0002-9149(00)01042-0
- 20 35. Jaar BG, Khatib R, Plantinga L, Boulware LE, Powe NR. Principles of screening for  
21 chronic kidney disease. *Clinical journal of the American Society of Nephrology* : *CJASN*.  
22 Mar 2008;3(2):601-9. doi:10.2215/cjn.02540607
- 23 36. de Jong PE, van der Velde M, Gansevoort RT, Zoccali C. Screening for chronic  
24 kidney disease: where does Europe go? *Clinical journal of the American Society of*  
25 *Nephrology* : *CJASN*. Mar 2008;3(2):616-23. doi:10.2215/cjn.04381007
- 26 37. Shlipak MG, Tummalaipalli SL, Boulware LE, et al. The case for early identification  
27 and intervention of chronic kidney disease: conclusions from a Kidney Disease: Improving  
28 Global Outcomes (KDIGO) Controversies Conference. *Kidney Int*. Jan 2021;99(1):34-47.  
29 doi:10.1016/j.kint.2020.10.012
- 30 38. Johnson DW, Atai E, Chan M, et al. KHA-CARI guideline: Early chronic kidney  
31 disease: detection, prevention and management. *Nephrology (Carlton, Vic)*. May  
32 2013;18(5):340-50. doi:10.1111/nep.12052
- 33 39. National Institute for Health and Care Excellence (NICE). Assessment and  
34 monitoring of chronic kidney disease. Updated 03 December 2020. Accessed 22 April 2021,  
35 <http://pathways.nice.org.uk/pathways/chronic-kidney-disease>
- 36 40. National Kidney Foundation. K/DOQI clinical practice guidelines for chronic kidney  
37 disease: evaluation, classification, and stratification. *American journal of kidney diseases* :  
38 *the official journal of the National Kidney Foundation*. Feb 2002;39(2 Suppl 1):S1-266.
- 39 41. ASN emphasizes need for early detection of kidney disease, a silent killer. American  
40 Society of Nephrology; 2013. [https://www.asn-](https://www.asn-online.org/news/2013/ASN_COMM_ACP_Screening_Response_102213_R12.pdf)  
41 [online.org/news/2013/ASN\\_COMM\\_ACP\\_Screening\\_Response\\_102213\\_R12.pdf](https://www.asn-online.org/news/2013/ASN_COMM_ACP_Screening_Response_102213_R12.pdf).
- 42 42. Garcia-Garcia G, Jha V, Li PKT, et al. Chronic kidney disease (CKD) in  
43 disadvantaged populations. Review. *Clinical kidney journal*. 2015;8(1):3-6.  
44 doi:10.1093/ckj/sfu124
- 45 43. Vassalotti JA, Li S, McCullough PA, Bakris GL. Kidney early evaluation program: a  
46 community-based screening approach to address disparities in chronic kidney disease.  
47 *Seminars in nephrology*. Jan 2010;30(1):66-73. doi:10.1016/j.semnephrol.2009.10.004
- 48 44. Obrador GT, García-García G, Villa AR, et al. Prevalence of chronic kidney disease  
49 in the Kidney Early Evaluation Program (KEEP) México and comparison with KEEP US.  
50 *Kidney Int*. 2010/03 2010;77:S2-S8. doi:10.1038/ki.2009.540
- 51  
52  
53  
54  
55  
56  
57  
58  
59  
60

- 1  
2  
3 45. Liu Q, Li Z, Wang H, et al. High prevalence and associated risk factors for impaired  
4 renal function and urinary abnormalities in a rural adult population from southern China.  
5 *PLoS One*. 2012;7(10):e47100. doi:10.1371/journal.pone.0047100  
6  
7 46. Tummalapalli SL, Vittinghoff E, Crews DC, et al. Chronic Kidney Disease  
8 Awareness and Longitudinal Health Outcomes: Results from the REasons for Geographic  
9 And Racial Differences in Stroke Study. *Am J Nephrol*. 2020;51(6):463-472.  
10 doi:10.1159/000507774  
11 47. Arksey H, O'Malley L. Scoping Studies: Towards a Methodological Framework.  
12 *International Journal of Social Research Methodology: Theory & Practice*. 2005;8(1):19-32.  
13 doi:10.1080/1364557032000119616  
14 48. Levac D, Colquhoun H, O'Brien KK. Scoping studies: advancing the methodology.  
15 *Implementation science : IS*. Sep 20 2010;5:69. doi:10.1186/1748-5908-5-69  
16 49. Colquhoun HL, Levac D, O'Brien KK, et al. Scoping reviews: time for clarity in  
17 definition, methods, and reporting. *Journal of clinical epidemiology*. Dec 2014;67(12):1291-  
18 4. doi:10.1016/j.jclinepi.2014.03.013  
19 50. Daudt HM, van Mossel C, Scott SJ. Enhancing the scoping study methodology: a  
20 large, inter-professional team's experience with Arksey and O'Malley's framework. *BMC*  
21 *medical research methodology*. Mar 23 2013;13:48. doi:10.1186/1471-2288-13-48  
22 51. Peters MDJ, Marnie C, Tricco AC, et al. Updated methodological guidance for the  
23 conduct of scoping reviews. *JBIM Evid Implement*. Mar 2021;19(1):3-10.  
24 doi:10.1097/xeb.0000000000000277  
25 52. Tricco AC, Lillie E, Zarin W, et al. PRISMA Extension for Scoping Reviews  
26 (PRISMA-ScR): Checklist and Explanation. *Annals of internal medicine*. Oct 2  
27 2018;169(7):467-473. doi:10.7326/m18-0850  
28 53. Peters MDJ GC, McInerney P, Munn Z, Tricco AC, Khalil, H. Chapter 11: Scoping  
29 Reviews (2020 version) In: In: Aromataris E MZE, ed. *Joanna Briggs Institute Reviewer's*  
30 *Manual, JBI, 2020*. 2020.  
31  
32  
33  
34  
35  
36  
37  
38  
39  
40  
41  
42  
43  
44  
45  
46  
47  
48  
49  
50  
51  
52  
53  
54  
55  
56  
57  
58  
59  
60

1  
2  
3 **FIGURE AND TABLE LEGENDS:**  
4

5  
6  
7 **Figure 1:** PRISMA-Flow chart for study selection  
8

9 **Table 1:** Persisting questions on usefulness and methodology of CKD screening programs  
10

11 **Table 2:** Medline search strategy  
12

13 **Table 3:** Data extraction items from empirical literature sources  
14  
15  
16  
17  
18  
19  
20  
21  
22  
23  
24  
25  
26  
27  
28  
29  
30  
31  
32  
33  
34  
35  
36  
37  
38  
39  
40  
41  
42  
43  
44  
45  
46  
47  
48  
49  
50  
51  
52  
53  
54  
55  
56  
57  
58  
59  
60

For peer review only

**Table 1:** Persisting questions on usefulness and methodology of CKD screening programs

| Questions related to the usefulness of CKD screening                                                                            | Questions related to the methodology of CKD screening                                                                     |
|---------------------------------------------------------------------------------------------------------------------------------|---------------------------------------------------------------------------------------------------------------------------|
| - Should CKD screening be used in an asymptomatic population with or without CKD risk factors such as hypertension or diabetes? | - Are single measurements sufficient for detecting CKD?                                                                   |
| - Are there unique risk factors in some populations we do not know about?                                                       | - Does population screening with serum creatinine and urine protein testing lead to improved outcomes without undue harm? |
| - Should therapies be initiated in those with mildly impaired eGFR or microalbuminuria?                                         | - Should screening be conducted in younger age groups without CKD risk factors?                                           |
| - Does earlier treatment improve the prognosis?                                                                                 | - What threshold of dipsticks positive proteinuria should be considered relevant for screening?                           |
| - Are CKD screening programs cost-effective?                                                                                    | - Who should manage screening and subsequent treatment?                                                                   |
| - Do the potential harms of CKD screening outweigh the benefits?                                                                | - What tests should be selected for CKD screening?                                                                        |
| - What is the yield of the screening service?                                                                                   | - How valid and repeatable is the screening test?                                                                         |
| - What are the implications of CKD screening for public health policy?                                                          |                                                                                                                           |

Abbreviations: CKD – chronic kidney disease; eGFR – estimated glomerular filtration rate



**Table 2:** Medline search strategy

1. exp Renal Insufficiency, Chronic/
2. Chronic Kidney disease\*.mp.
3. chronic kidney insufficienc\*.mp.
4. chronic renal disease\*.mp.
5. chronic renal insufficienc\*.mp.
6. CKD.mp.
7. Renal fail\*.mp.
8. Kidney fail\*.mp.
9. or/1-8
10. Multiphasic Screening/ and (program\* or campaign\* or strateg\* or initiative\*).mp.
11. Mass Screening/
12. (screen\* adj2 (program\* or strateg\* or campaign\* or initiative\*)).mp.
13. (awareness adj3 (program\* or campaign\* or strateg\* or initiative\*)).mp.
14. (detect\* adj3 (program\* or campaign\* or strateg\* or initiative\*)).mp.
15. (National Health and Nutrition Examination Survey).mp.
16. Kidney Early Evaluation Program.mp.
17. (Prevention of Renal and Vascular End-Stage Disease).mp.
18. World Kidney Day.mp.
19. national kidney foundation.mp.
20. (Screening and Early Evaluation of Kidney disease).mp.
21. or/15-20
22. 21 and (screen\* or detect\* or awareness).mp.
23. or/10-14,22
24. 9 and 23
25. ((detect\* or screen\* or awareness) adj2 ("chronic kidney" or "chronic renal")).mp.
26. 24 or 25
27. exp animals/ not humans.sh.
28. 26 not 27

**Table 3:** Data extraction items from empirical literature sources

| Population screened                                                                                                                                                                                                                  | Measurements                          | Interventions                                      | Implementation                                                                                |
|--------------------------------------------------------------------------------------------------------------------------------------------------------------------------------------------------------------------------------------|---------------------------------------|----------------------------------------------------|-----------------------------------------------------------------------------------------------|
| Country, income group                                                                                                                                                                                                                | Number of measurements (1x / 2x)      | Lifestyle measures*                                | Cost measures reported                                                                        |
| Type of program (national / others)                                                                                                                                                                                                  | Urine dipsticks (protein $\pm$ blood) | RAAS blockade                                      | Reported to be cost-effective                                                                 |
| Demographic features (Age, gender, ethnicity, rural / urban setting)                                                                                                                                                                 | Urine ACR / PCR only                  | Antidiabetic medications (any)                     | Screening strategy adopted or not implemented due to lack of efficacy (e.g., policy document) |
| Workforce involved in screening                                                                                                                                                                                                      | SCR / eGFR only                       | Anti-hypertensive medications (separate from RAAS) |                                                                                               |
| Screening type:                                                                                                                                                                                                                      | Urine + SCR / eGFR                    | Lipid treatment                                    |                                                                                               |
| Mass screening (yes / no)                                                                                                                                                                                                            | POCT                                  | Avoidance of nephrotoxins                          |                                                                                               |
| Targeted screening (yes / no)                                                                                                                                                                                                        | Other tests (e.g., cystatin C)        | Referral to nephrology service                     |                                                                                               |
| <ul style="list-style-type: none"> <li>• Hypertensives</li> <li>• Diabetics</li> <li>• Elderly</li> <li>• Family history of CKD</li> <li>• HIV</li> <li>• Minority group (e.g., Indigenous populations)</li> <li>• Others</li> </ul> | Reported CKD prevalence (yes / no)    | Referral for KRT                                   |                                                                                               |
| Risk factors assessed and reported:                                                                                                                                                                                                  |                                       |                                                    |                                                                                               |
| <ul style="list-style-type: none"> <li>• BP</li> <li>• Blood glucose</li> <li>• Body weight / BMI</li> <li>• Lipids</li> <li>• Others</li> </ul>                                                                                     |                                       |                                                    |                                                                                               |
| Risk stratification (yes / no)                                                                                                                                                                                                       |                                       |                                                    |                                                                                               |

CKD – Chronic kidney disease, HIC – high-income country, UMIC – upper middle-income country, LMIC – lower middle-income country, LIC – low-income country, HIV – human immunodeficiency virus, ACR – albumin-creatinine ratio, PCR – protein creatinine ratio, SCR – serum creatinine, eGFR- estimated glomerular filtration rate, BP – blood pressure, BMI – body mass index, RAAS – renin-angiotensin aldosterone system, KRT – kidney replacement therapy (any of hemodialysis, peritoneal dialysis, kidney transplantation), POCT – point of care test (e.g. saliva), \*(smoking cessation, weight reduction measures, dietary measures, etc.)



1  
2  
3  
4  
5  
6  
7  
8  
9  
10  
11  
12  
13  
14  
15  
16  
17  
18  
19  
20  
21  
22  
23  
24  
25  
26  
27  
28  
29  
30  
31  
32  
33  
34  
35  
36  
37  
38  
39  
40  
41  
42  
43  
44  
45  
46  
47  
48  
49  
50  
51  
52  
53  
54  
55  
56  
57  
58  
59  
60

**Figure 1: PRISMA-Flow chart for study selection**

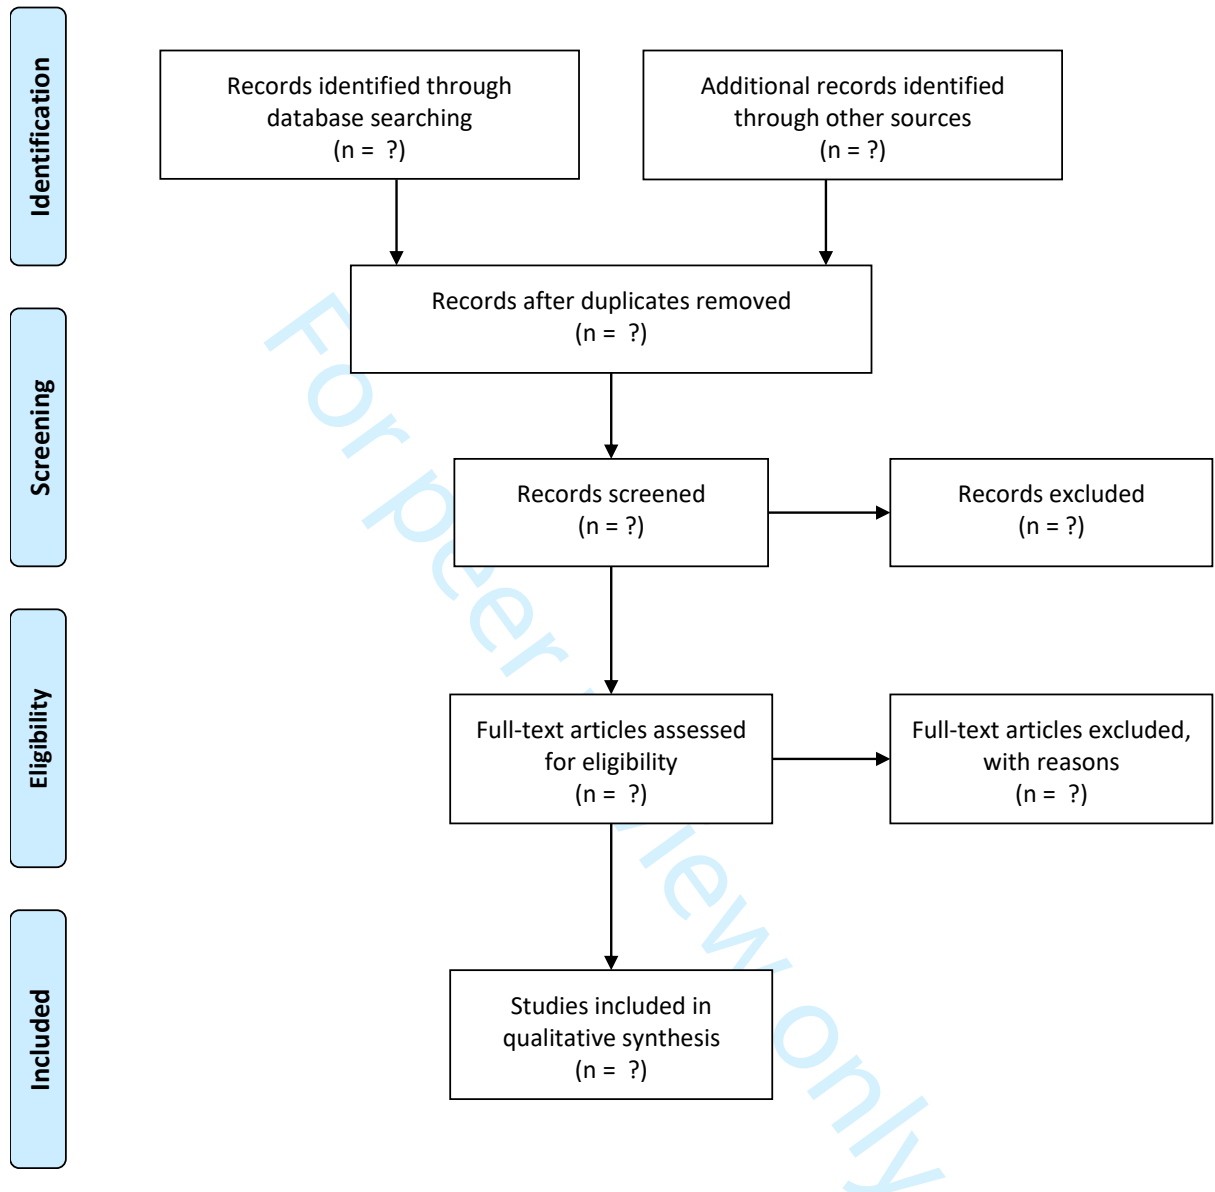

## Preferred Reporting Items for Systematic reviews and Meta-Analyses extension for Scoping Reviews (PRISMA-ScR) Checklist

| SECTION                                               | ITEM | PRISMA-ScR CHECKLIST ITEM                                                                                                                                                                                                                                                                                  | REPORTED ON PAGE # |
|-------------------------------------------------------|------|------------------------------------------------------------------------------------------------------------------------------------------------------------------------------------------------------------------------------------------------------------------------------------------------------------|--------------------|
| <b>TITLE</b>                                          |      |                                                                                                                                                                                                                                                                                                            |                    |
| Title                                                 | 1    | Identify the report as a scoping review.                                                                                                                                                                                                                                                                   |                    |
| <b>ABSTRACT</b>                                       |      |                                                                                                                                                                                                                                                                                                            |                    |
| Structured summary                                    | 2    | Provide a structured summary that includes (as applicable): background, objectives, eligibility criteria, sources of evidence, charting methods, results, and conclusions that relate to the review questions and objectives.                                                                              |                    |
| <b>INTRODUCTION</b>                                   |      |                                                                                                                                                                                                                                                                                                            |                    |
| Rationale                                             | 3    | Describe the rationale for the review in the context of what is already known. Explain why the review questions/objectives lend themselves to a scoping review approach.                                                                                                                                   |                    |
| Objectives                                            | 4    | Provide an explicit statement of the questions and objectives being addressed with reference to their key elements (e.g., population or participants, concepts, and context) or other relevant key elements used to conceptualize the review questions and/or objectives.                                  |                    |
| <b>METHODS</b>                                        |      |                                                                                                                                                                                                                                                                                                            |                    |
| Protocol and registration                             | 5    | Indicate whether a review protocol exists; state if and where it can be accessed (e.g., a Web address); and if available, provide registration information, including the registration number.                                                                                                             |                    |
| Eligibility criteria                                  | 6    | Specify characteristics of the sources of evidence used as eligibility criteria (e.g., years considered, language, and publication status), and provide a rationale.                                                                                                                                       |                    |
| Information sources*                                  | 7    | Describe all information sources in the search (e.g., databases with dates of coverage and contact with authors to identify additional sources), as well as the date the most recent search was executed.                                                                                                  |                    |
| Search                                                | 8    | Present the full electronic search strategy for at least 1 database, including any limits used, such that it could be repeated.                                                                                                                                                                            |                    |
| Selection of sources of evidence†                     | 9    | State the process for selecting sources of evidence (i.e., screening and eligibility) included in the scoping review.                                                                                                                                                                                      |                    |
| Data charting process‡                                | 10   | Describe the methods of charting data from the included sources of evidence (e.g., calibrated forms or forms that have been tested by the team before their use, and whether data charting was done independently or in duplicate) and any processes for obtaining and confirming data from investigators. |                    |
| Data items                                            | 11   | List and define all variables for which data were sought and any assumptions and simplifications made.                                                                                                                                                                                                     |                    |
| Critical appraisal of individual sources of evidence§ | 12   | If done, provide a rationale for conducting a critical appraisal of included sources of evidence; describe the methods used and how this information was used in any data synthesis (if appropriate).                                                                                                      |                    |
| Synthesis of results                                  | 13   | Describe the methods of handling and summarizing the data that were charted.                                                                                                                                                                                                                               |                    |

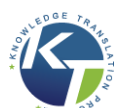

| SECTION                                       | ITEM | PRISMA-ScR CHECKLIST ITEM                                                                                                                                                                       | REPORTED ON PAGE # |
|-----------------------------------------------|------|-------------------------------------------------------------------------------------------------------------------------------------------------------------------------------------------------|--------------------|
| <b>RESULTS</b>                                |      |                                                                                                                                                                                                 |                    |
| Selection of sources of evidence              | 14   | Give numbers of sources of evidence screened, assessed for eligibility, and included in the review, with reasons for exclusions at each stage, ideally using a flow diagram.                    |                    |
| Characteristics of sources of evidence        | 15   | For each source of evidence, present characteristics for which data were charted and provide the citations.                                                                                     |                    |
| Critical appraisal within sources of evidence | 16   | If done, present data on critical appraisal of included sources of evidence (see item 12).                                                                                                      |                    |
| Results of individual sources of evidence     | 17   | For each included source of evidence, present the relevant data that were charted that relate to the review questions and objectives.                                                           |                    |
| Synthesis of results                          | 18   | Summarize and/or present the charting results as they relate to the review questions and objectives.                                                                                            |                    |
| <b>DISCUSSION</b>                             |      |                                                                                                                                                                                                 |                    |
| Summary of evidence                           | 19   | Summarize the main results (including an overview of concepts, themes, and types of evidence available), link to the review questions and objectives, and consider the relevance to key groups. |                    |
| Limitations                                   | 20   | Discuss the limitations of the scoping review process.                                                                                                                                          |                    |
| Conclusions                                   | 21   | Provide a general interpretation of the results with respect to the review questions and objectives, as well as potential implications and/or next steps.                                       |                    |
| <b>FUNDING</b>                                |      |                                                                                                                                                                                                 |                    |
| Funding                                       | 22   | Describe sources of funding for the included sources of evidence, as well as sources of funding for the scoping review. Describe the role of the funders of the scoping review.                 |                    |

JBI = Joanna Briggs Institute; PRISMA-ScR = Preferred Reporting Items for Systematic reviews and Meta-Analyses extension for Scoping Reviews.

\* Where *sources of evidence* (see second footnote) are compiled from, such as bibliographic databases, social media platforms, and Web sites.

† A more inclusive/heterogeneous term used to account for the different types of evidence or data sources (e.g., quantitative and/or qualitative research, expert opinion, and policy documents) that may be eligible in a scoping review as opposed to only studies. This is not to be confused with *information sources* (see first footnote).

‡ The frameworks by Arksey and O'Malley (6) and Levac and colleagues (7) and the JBI guidance (4, 5) refer to the process of data extraction in a scoping review as data charting.

§ The process of systematically examining research evidence to assess its validity, results, and relevance before using it to inform a decision. This term is used for items 12 and 19 instead of "risk of bias" (which is more applicable to systematic reviews of interventions) to include and acknowledge the various sources of evidence that may be used in a scoping review (e.g., quantitative and/or qualitative research, expert opinion, and policy document).

From: Tricco AC, Lillie E, Zarin W, O'Brien KK, Colquhoun H, Levac D, et al. PRISMA Extension for Scoping Reviews (PRISMA-ScR): Checklist and Explanation. *Ann Intern Med.* 2018;169:467–473. doi: [10.7326/M18-0850](https://doi.org/10.7326/M18-0850).



Supplement: bmjopen-2021-053857.draft_revisions.pdf [file bmjopen-2021-053857.draft_revisions.pdf]
